# Supplementary material for: First year STEM curriculum co-created with Indigenous scientists improves intellectual growth, psychosocial factors associated with retention, and academic achievement of students from racially minoritized groups historically underrepresented in STEM.
Source: Research Square preprint supplement (doi:10.21203/rs.3.rs-3062893/v1), 2023-06-30
Supplement: Supplementary file 1 [file 02edba177389cb214b049b6d.pdf]

# Revisiting the Eutrophication Experiment

Through the Lenses of Botany, Math, Biology and Critical Thinking

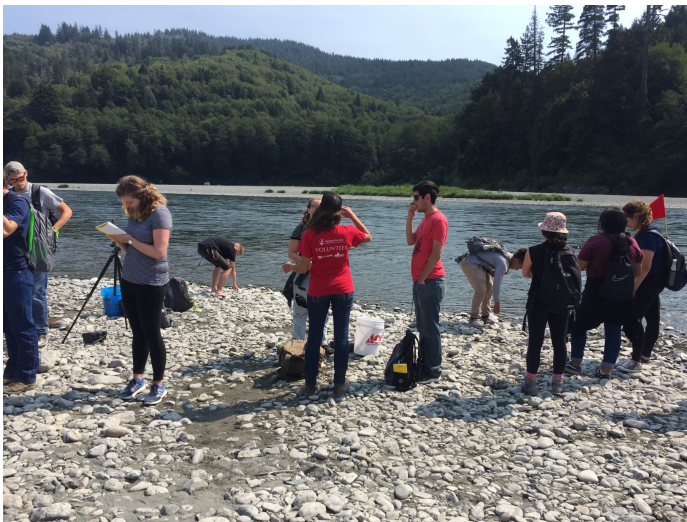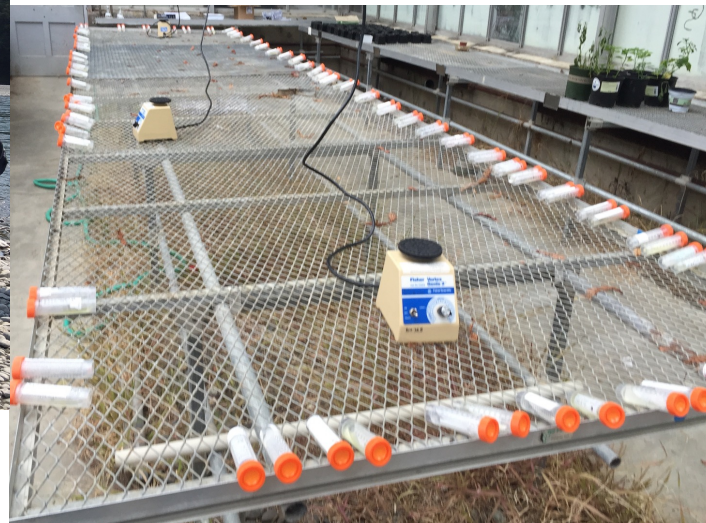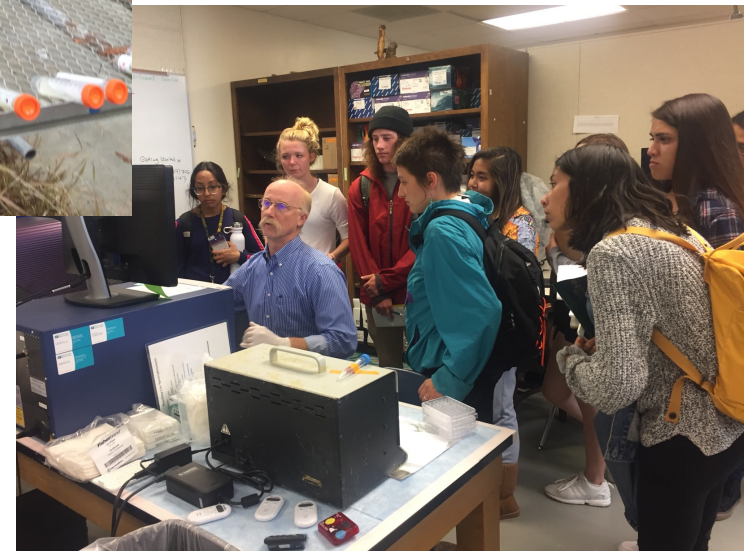

*Microcystis* – one of several cyanobacteria (blue green algae) that may form Harmful Algal Blooms (HABs)

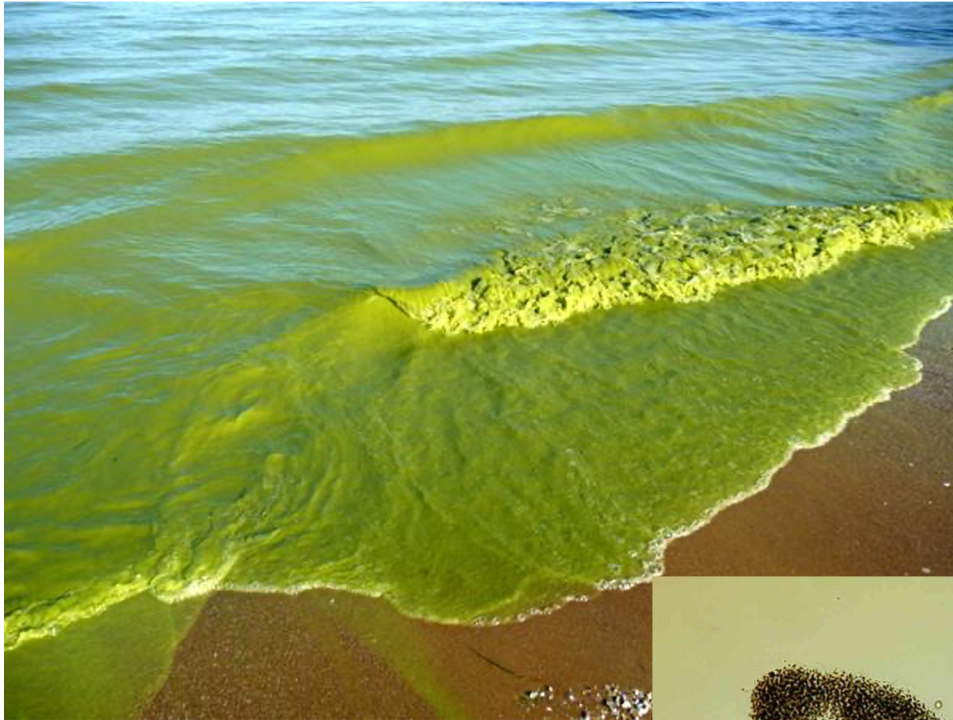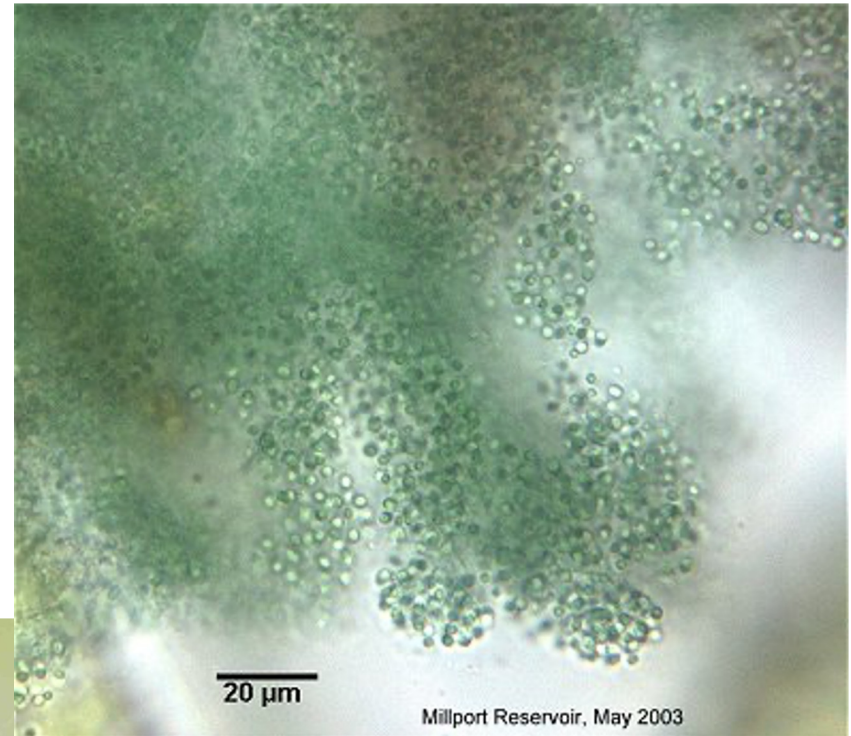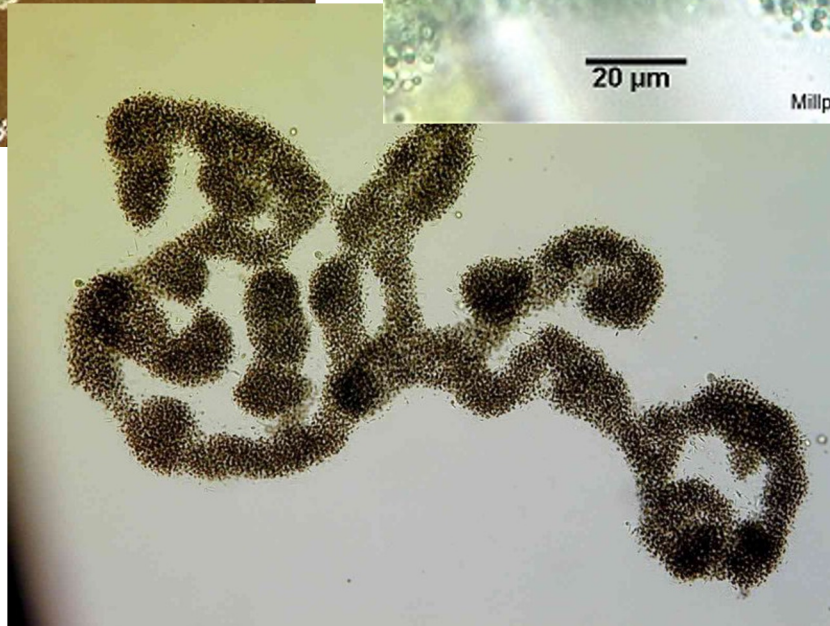

<http://cfb.unh.edu/phycokey/Choices/Cyanobacteria>

# Why is Nitrogen the *Limiting Factor* ?

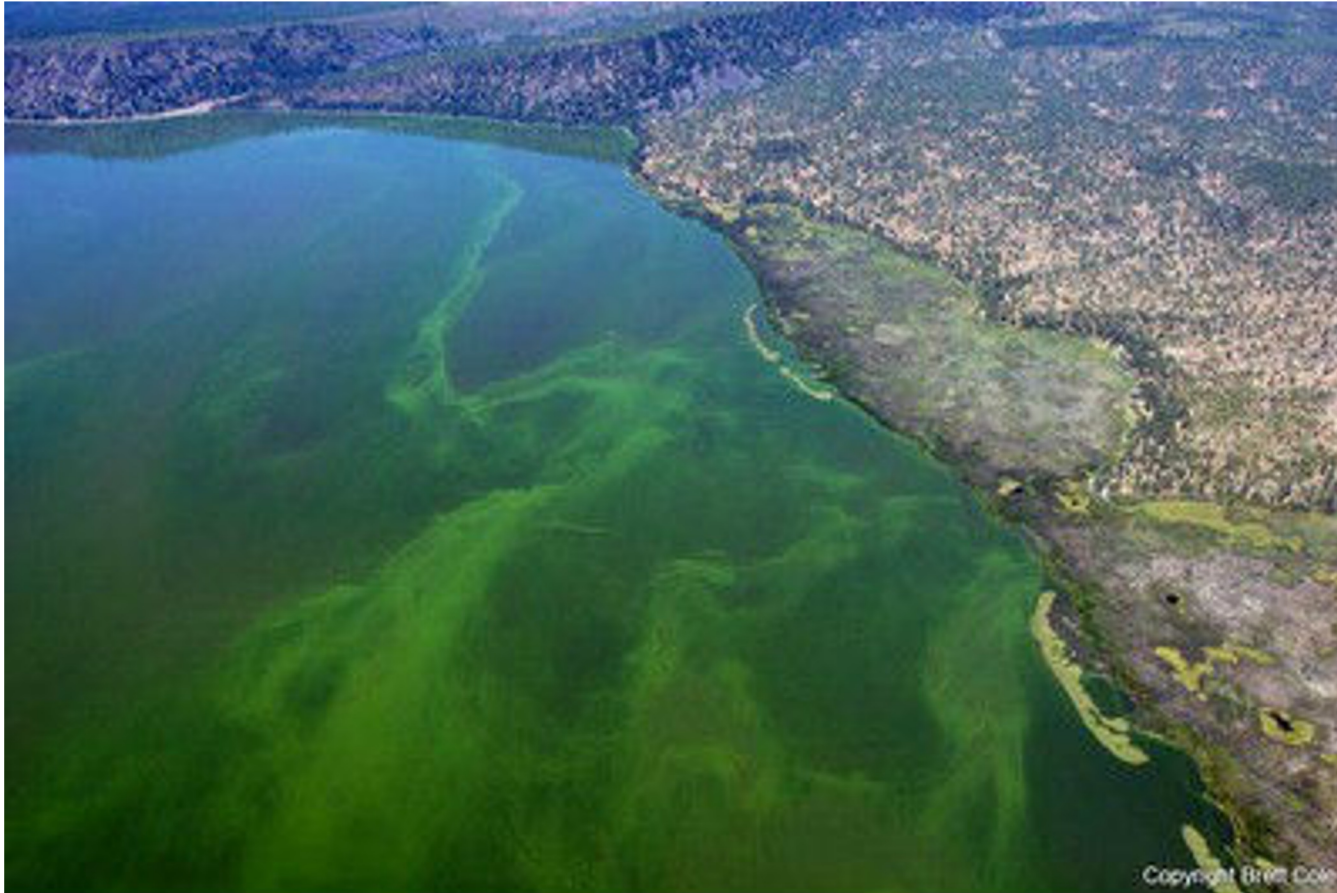

[http://blog.healthkismet.com/wp-content/uploads/2012/04/klamath\\_lake\\_blue\\_algae.jpg](http://blog.healthkismet.com/wp-content/uploads/2012/04/klamath_lake_blue_algae.jpg)

Klamath Lake 2012

# WHAT CAUSES CYANOBACTERIA BLOOMS?

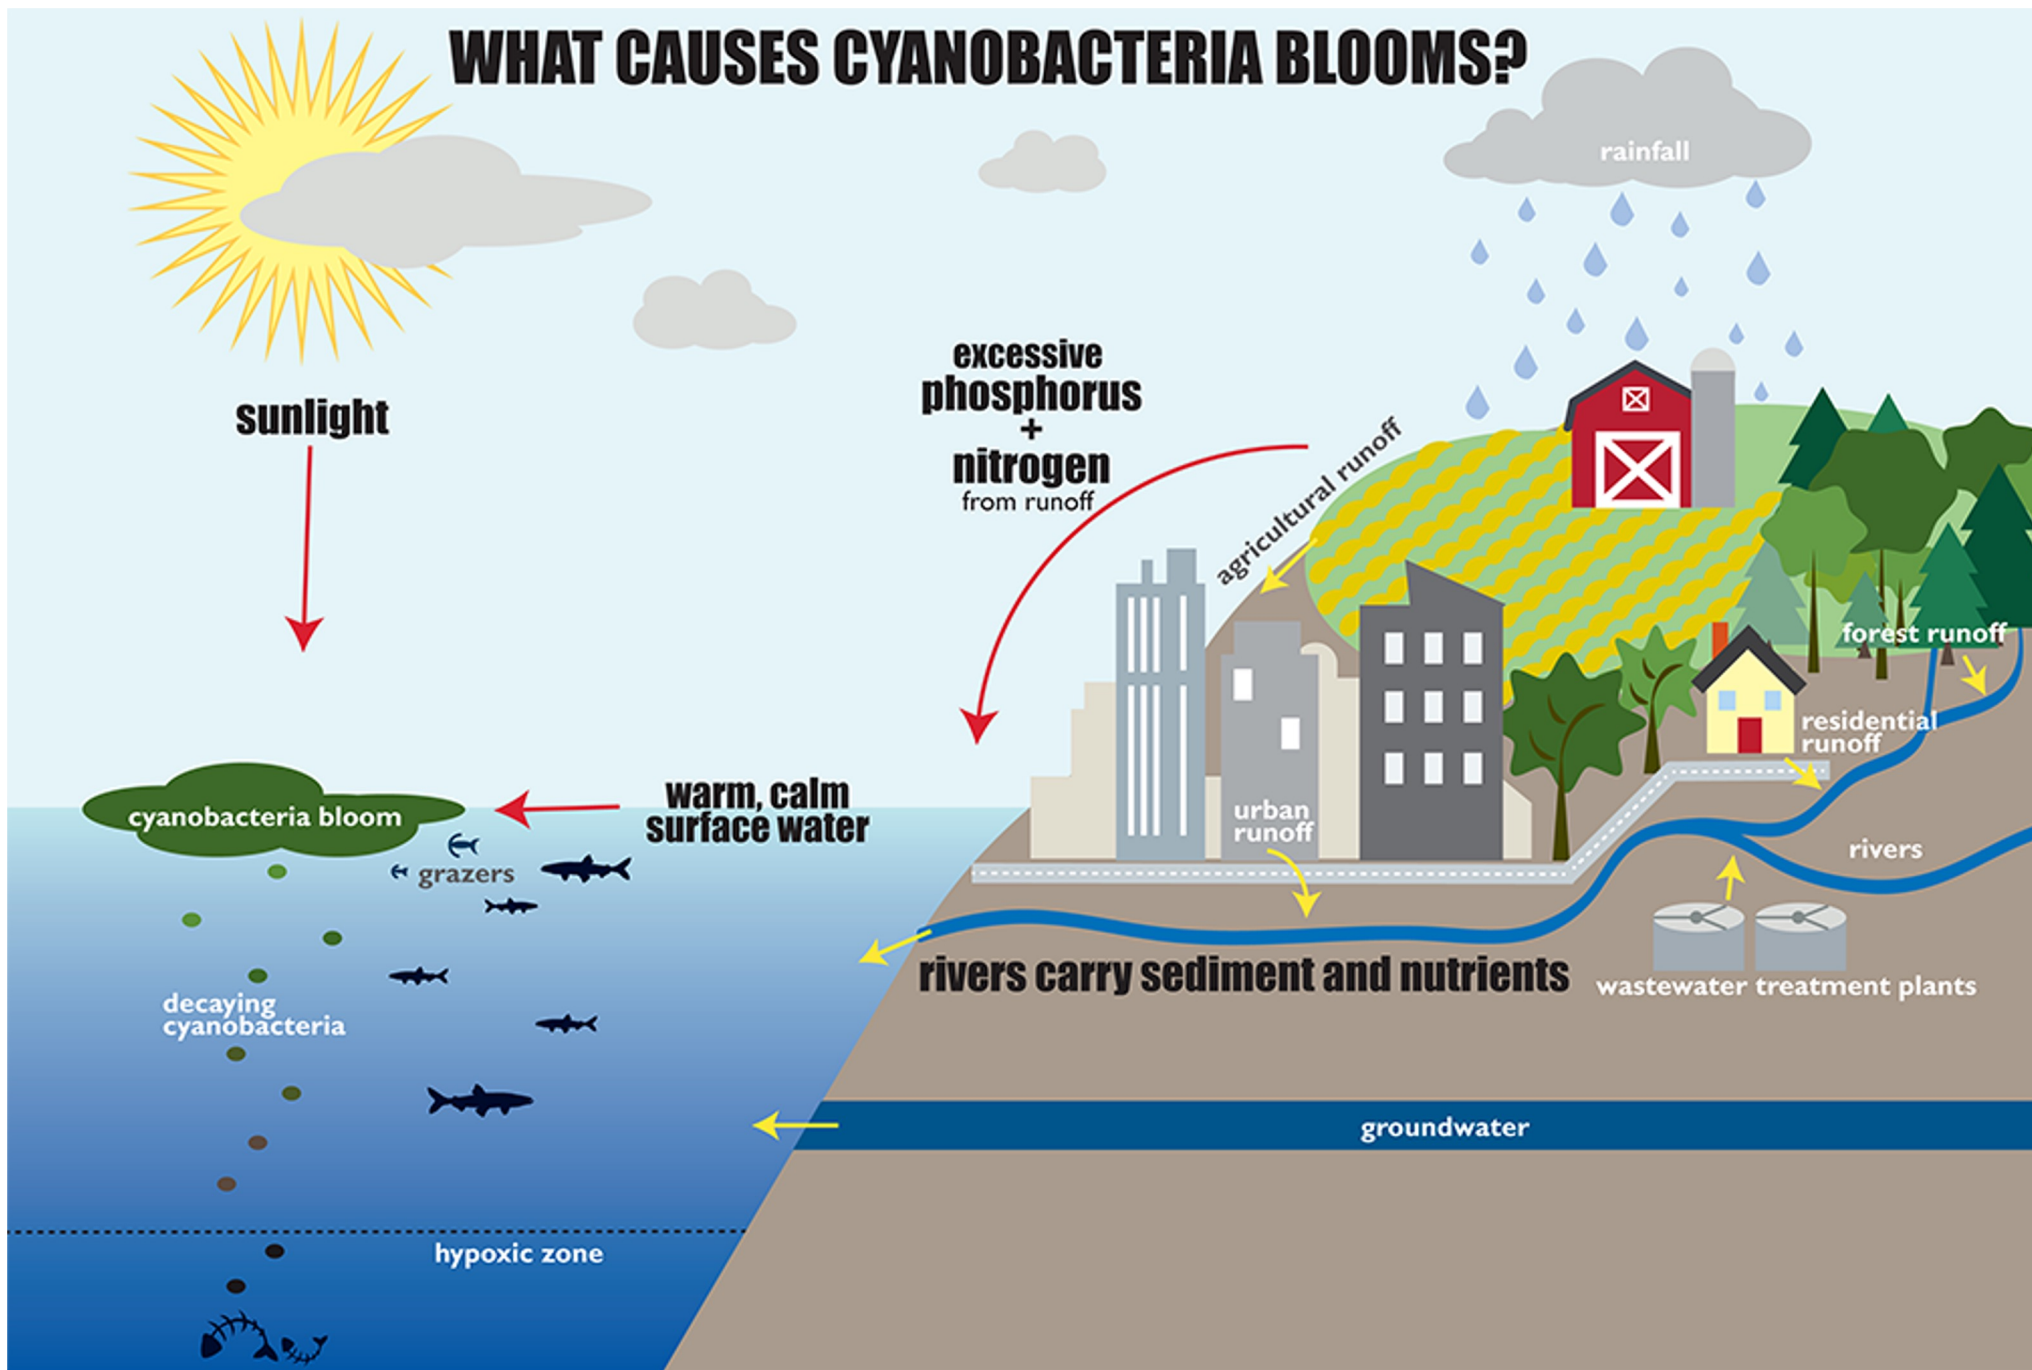

# Method for Measuring Microalgal Growth: The Pigment Approach (Proxy for Biomass and/or Cell #)

Cross-section through a cyanobacterial cell

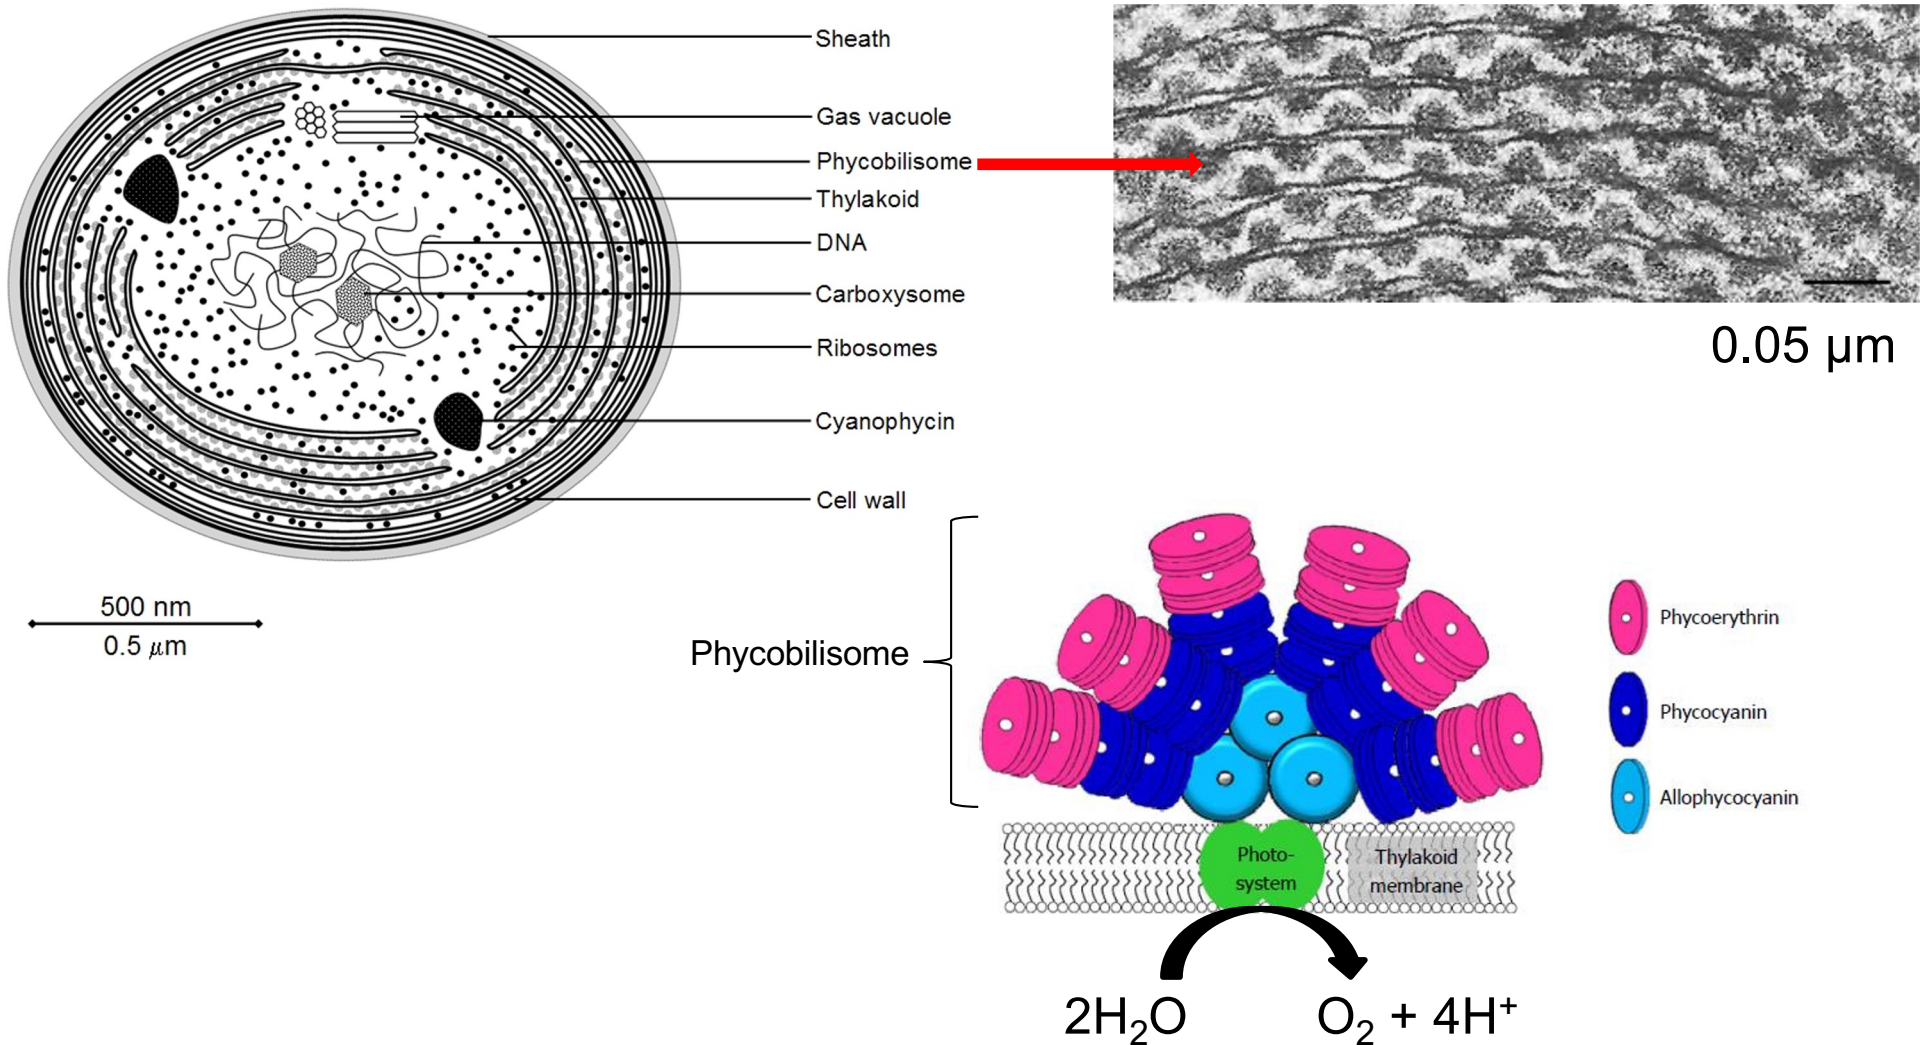

## The Pigment Approach Continued: Relative Fluorescence Units (RFUs)

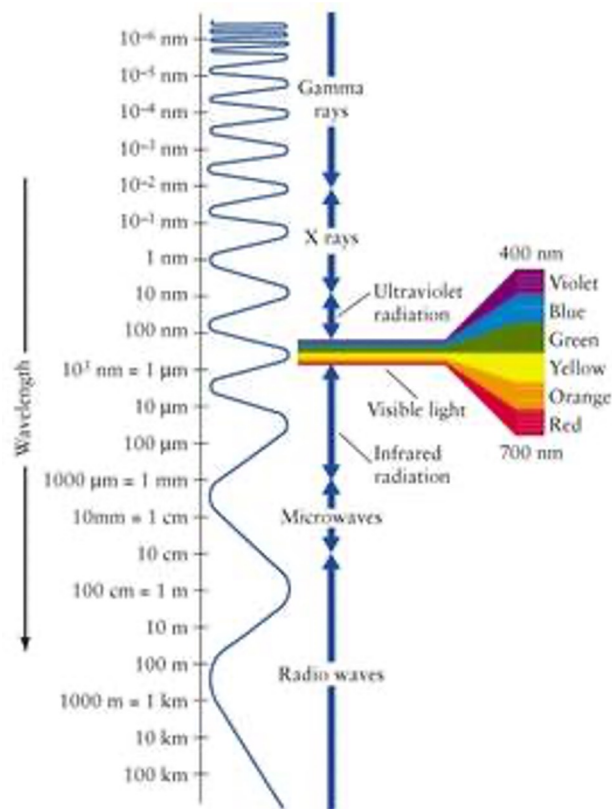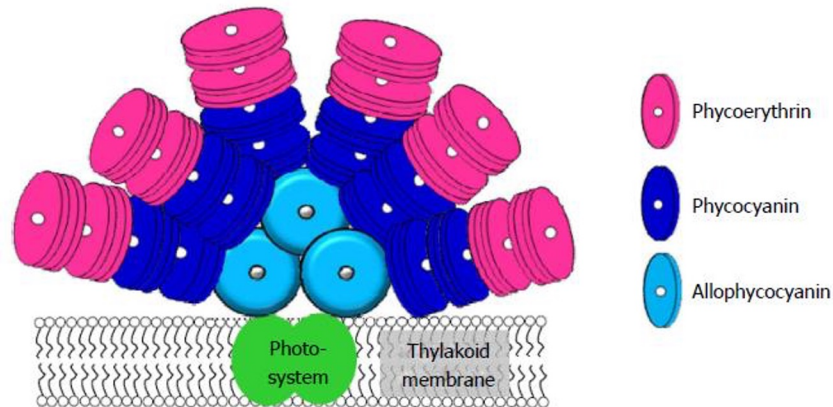

Upon reaching a plant, 4 things can happen to light energy:

1. Reflected rather than absorbed.
2. Not absorbed by a pigment, becomes **heat**
3. Absorbed by a pigment and runs **through the electron transport** reactions (= light reactions) of photosynthesis to make high energy molecules used for carbon fixation – good!
4. Absorbed by a pigment but **fails to move through electron transport**; returns to a lower energy state via giving off energy as light - as **fluorescence**.

# Your Experiment Takes Advantage of Fluorescence to Quantify the Amount of Algal Cells Present in a Sample

Assumption: More Fluorescence (RFUs) = More Algal Cells

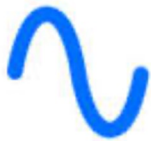

A blue photon

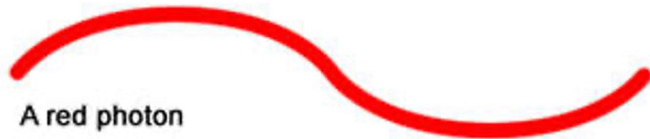

A red photon

Fluorescence occurs at a longer wavelength than the wavelength of the original photon. RFUs are measured at the new, longer wavelength.

# The RFU Pigment Approach can Discriminate between General Algal Groups

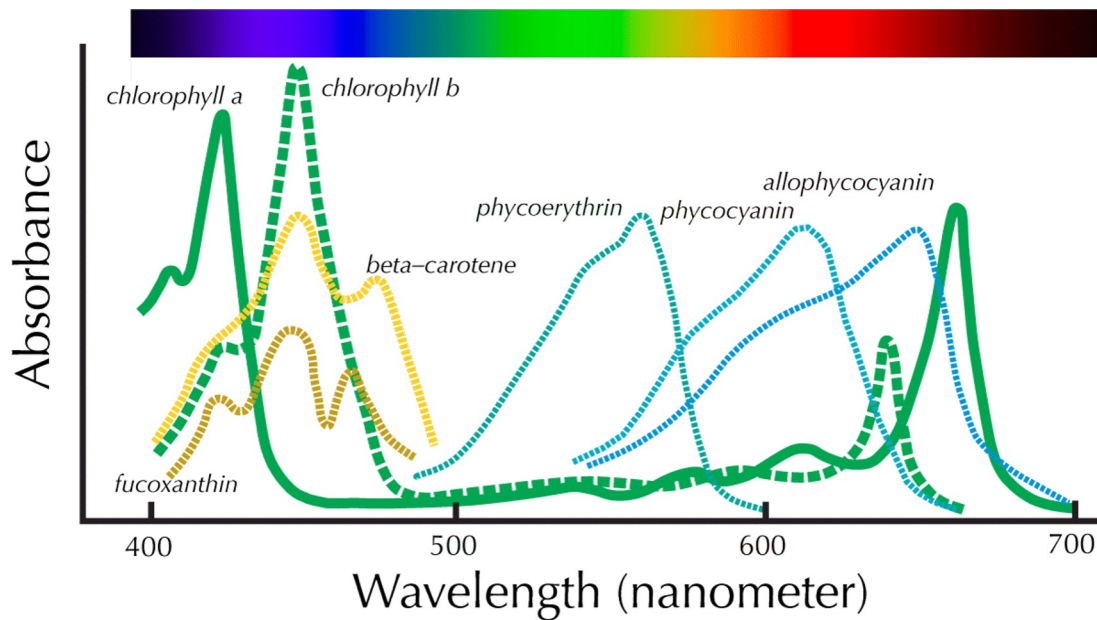

J. Kann Ph.D. Aquatic Ecosystem Sciences, LLC

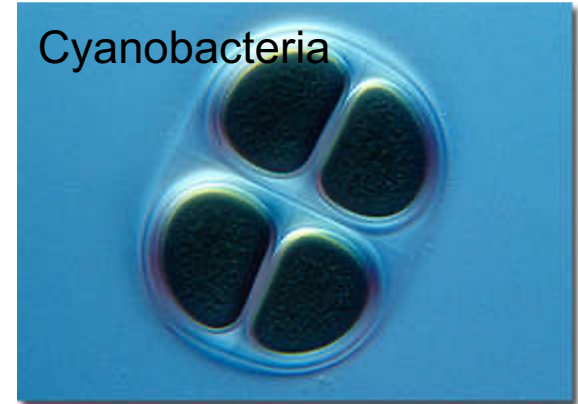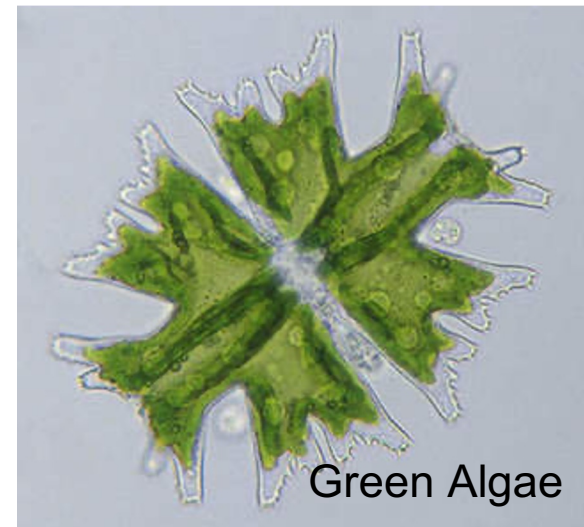

# H-D method

**In the case of the Klamath River samples, we posed the following hypotheses and predictions:**

$H_1$ : N is limiting algae growth in Klamath River water samples. *If N is limiting, then we predict that RFUs will increase more in flasks with added N than in control flasks.*

$H_0$ : N is not limiting algae growth in Klamath River water samples. *If N is not limiting, then we predict that RFUs will be as high as or higher in controls than in flasks with added N.*

1. For  $H_1$ , do you think the prediction is logically necessary? Why or why not? What “word trick” can you use to examine a prediction’s logical necessity?

# H-D method

**In the case of the Klamath River samples, we posed the following hypotheses and predictions:**

$H_1$ : N is limiting algae growth in Klamath River water samples. *If N is limiting, then we predict that RFUs will increase more in flasks with added N than in control flasks.*

$H_0$ : N is not limiting algae growth in Klamath River water samples. *If N is not limiting, then we predict that RFUs will be as high as or higher in controls than in flasks with added N.*

2. Do you think the prediction for  $H_1$  is logically sufficient? Why or why not? What “word trick” can you use to examine a prediction’s logical sufficiency?

# H-D method

**In the case of the Klamath River samples, we posed the following hypotheses and predictions:**

$H_1$ : N is limiting algae growth in Klamath River water samples. *If N is limiting, then we predict that RFUs will increase more in flasks with added N than in control flasks.*

$H_0$ : N is not limiting algae growth in Klamath River water samples. *If N is not limiting, then we predict that RFUs will be as high as or higher in controls than in flasks with added N.*

3. Suppose the data are consistent with the prediction that *RFUs will increase more in flasks with added N than in control flasks* and we conclude that N limits algae growth in lower Klamath River Water samples. Is this conclusion deductively valid? Why or why not? Is it strong?

# Collect data & test prediction

## Prediction of $H_1$ :

*If  $N$  is limiting, then we predict that RFUs will increase more in flasks with added  $N$  than in control flasks.*

If Polly is a bird, then Polly has feathers.

## Data:

*RFUs increased more in flasks with added  $N$  than in control flasks.*

Polly has feathers.

## Conclusion:

*$N$  is limiting algae growth in Klamath River water samples.*

Polly is a bird.

***Is this conclusion reached by valid deduction?***

**1.If H, then P**

**2.P**

**3.So, H**

***NO! Affirming the consequent.***

***Not technically deductively valid, but provides strong presumptive (inductive) evidence for  $H_1$ . Why?***

# Collect data & test prediction

## Prediction of $H_0$ :

*If  $N$  is not limiting, then we predict that RFUs will be as high as or higher in controls than in flasks with added  $N$ .*

## Data:

*RFUs increased more in flasks with added  $N$  than in control flasks.*

## Conclusion:

*We can reject the null hypothesis that  $N$  is no limiting algal growth in Klamath River samples.*

***Is this conclusion reached by valid deduction?***

**1.If H, then P**

**2.Not P**

**3.So, not H**

***Yes! Modus Tollens, falsifying the consequent.  
Deductively valid.***

# H-D method

So...what did the data look like?

# It is all in the numbers!

- We looked at the amounts of Chl A and Phycocyanin for treated (nitrogen added) and untreated samples as measured in RFUs at time 0 and seven days later.
- Samples from Terwer were analyzed.
- We performed linear regression and compared rates of change for treated and untreated samples.

# The Big Spread Sheet

## Chlorophyll Fluorescence

470/700

RED= Plastic  
RFU

|   | 1     | 2    | 3     | 4      | 5     | 6      | 7      | 8      |
|---|-------|------|-------|--------|-------|--------|--------|--------|
| A | 9144  | 5827 | 71836 | 1304   | 1420  | 287641 | 35905  | 23917  |
| B | 17500 | 8998 | 4332  | 65730  | 15274 | 5869   | 1937   | 1423   |
| C | 1879  | 2166 | 1710  | 199738 | 1768  | 1882   | 1026   | 1881   |
| D | 1711  | 1369 | 1939  | 10950  | 1996  | 1938   | 103206 | 162055 |
| E | 1140  | 1939 | 1882  | 1426   | 1312  | 1312   | 41058  | 97566  |
| F | 1483  | 1997 | 1483  | 1483   | 2282  | 1825   | 23781  | 176734 |

## Phcocyanin

590/670

RED= Plastic RFU

|   | 1      | 2    | 3     | 4     | 5     | 6     | 7     | 8     |
|---|--------|------|-------|-------|-------|-------|-------|-------|
| A | 289677 | 5827 | 30974 | 6738  | 4494  | 92153 | 16185 | 10793 |
| B | 11249  | 8998 | 7199  | 32843 | 10347 | 8546  | 7196  | 3597  |
| C | 3599   | 3150 | 4050  | 58951 | 5400  | 3150  | 4051  | 4500  |
| D | 5402   | 4501 | 2701  | 9002  | 7651  | 4950  | 36905 | 57140 |
| E | 3150   | 4951 | 4501  | 3151  | 5402  | 4051  | 18006 | 31063 |
| F | 5403   | 4502 | 5402  | 7203  | 4502  | 6302  | 12605 | 55357 |

# Terwer-Chl A

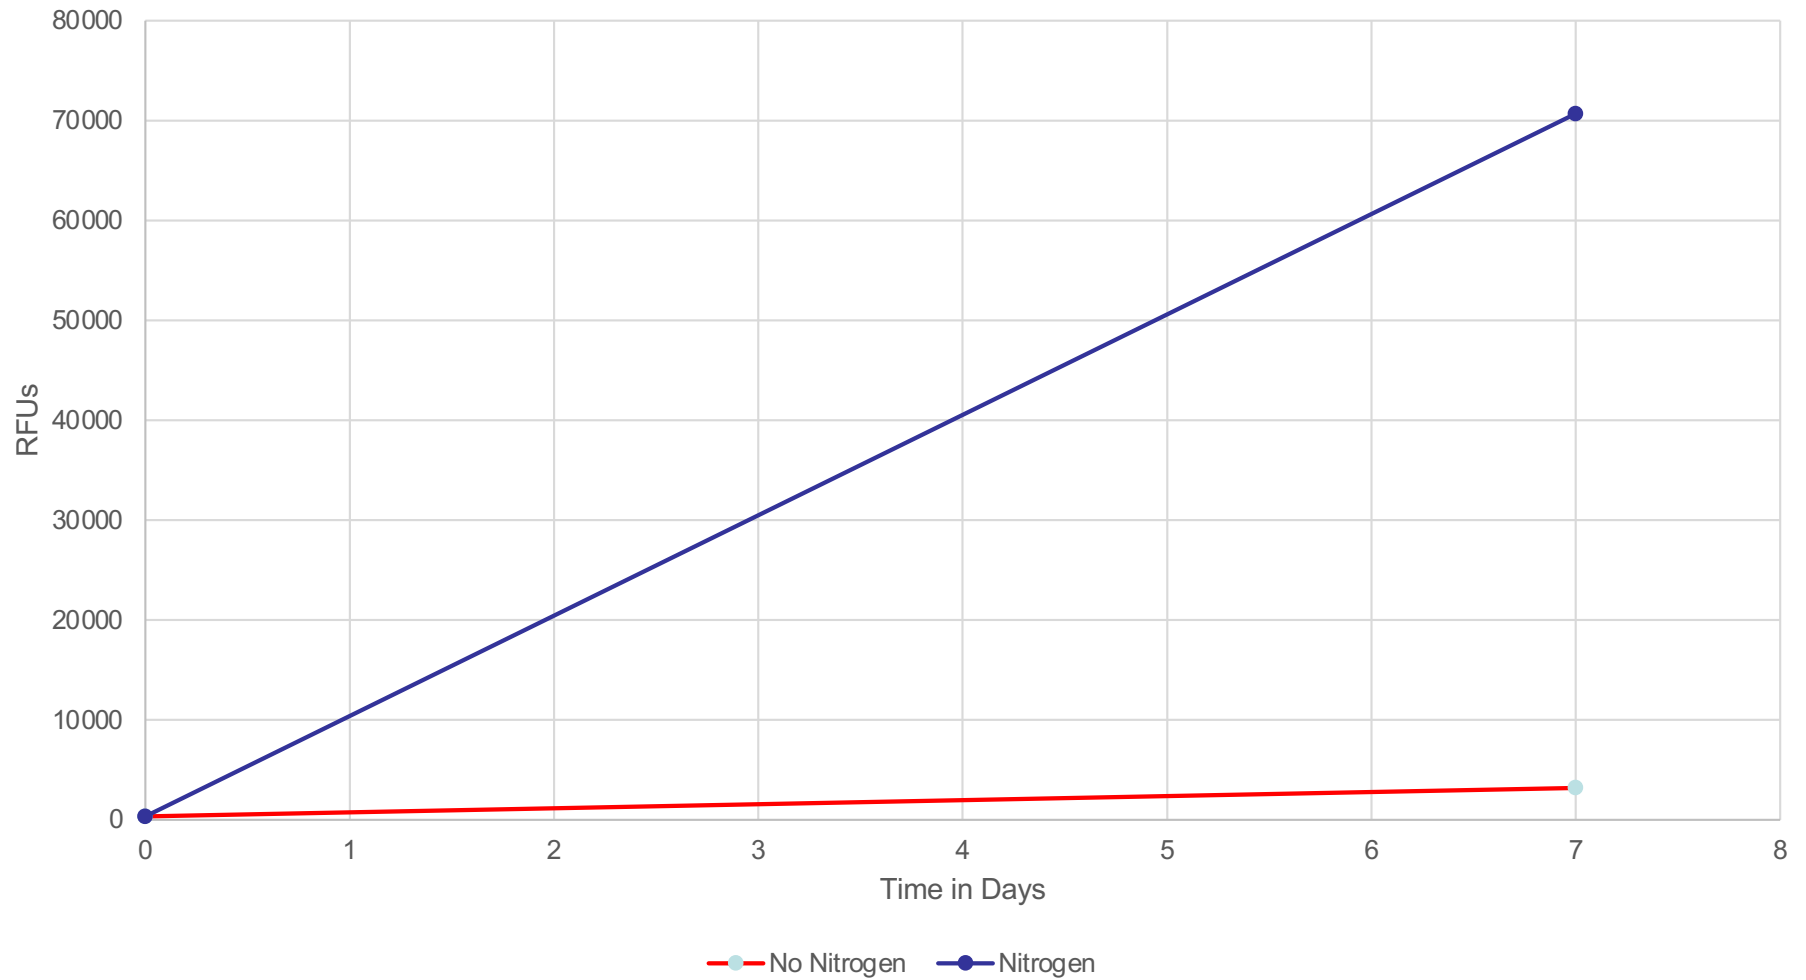

# Terwer-Chl A

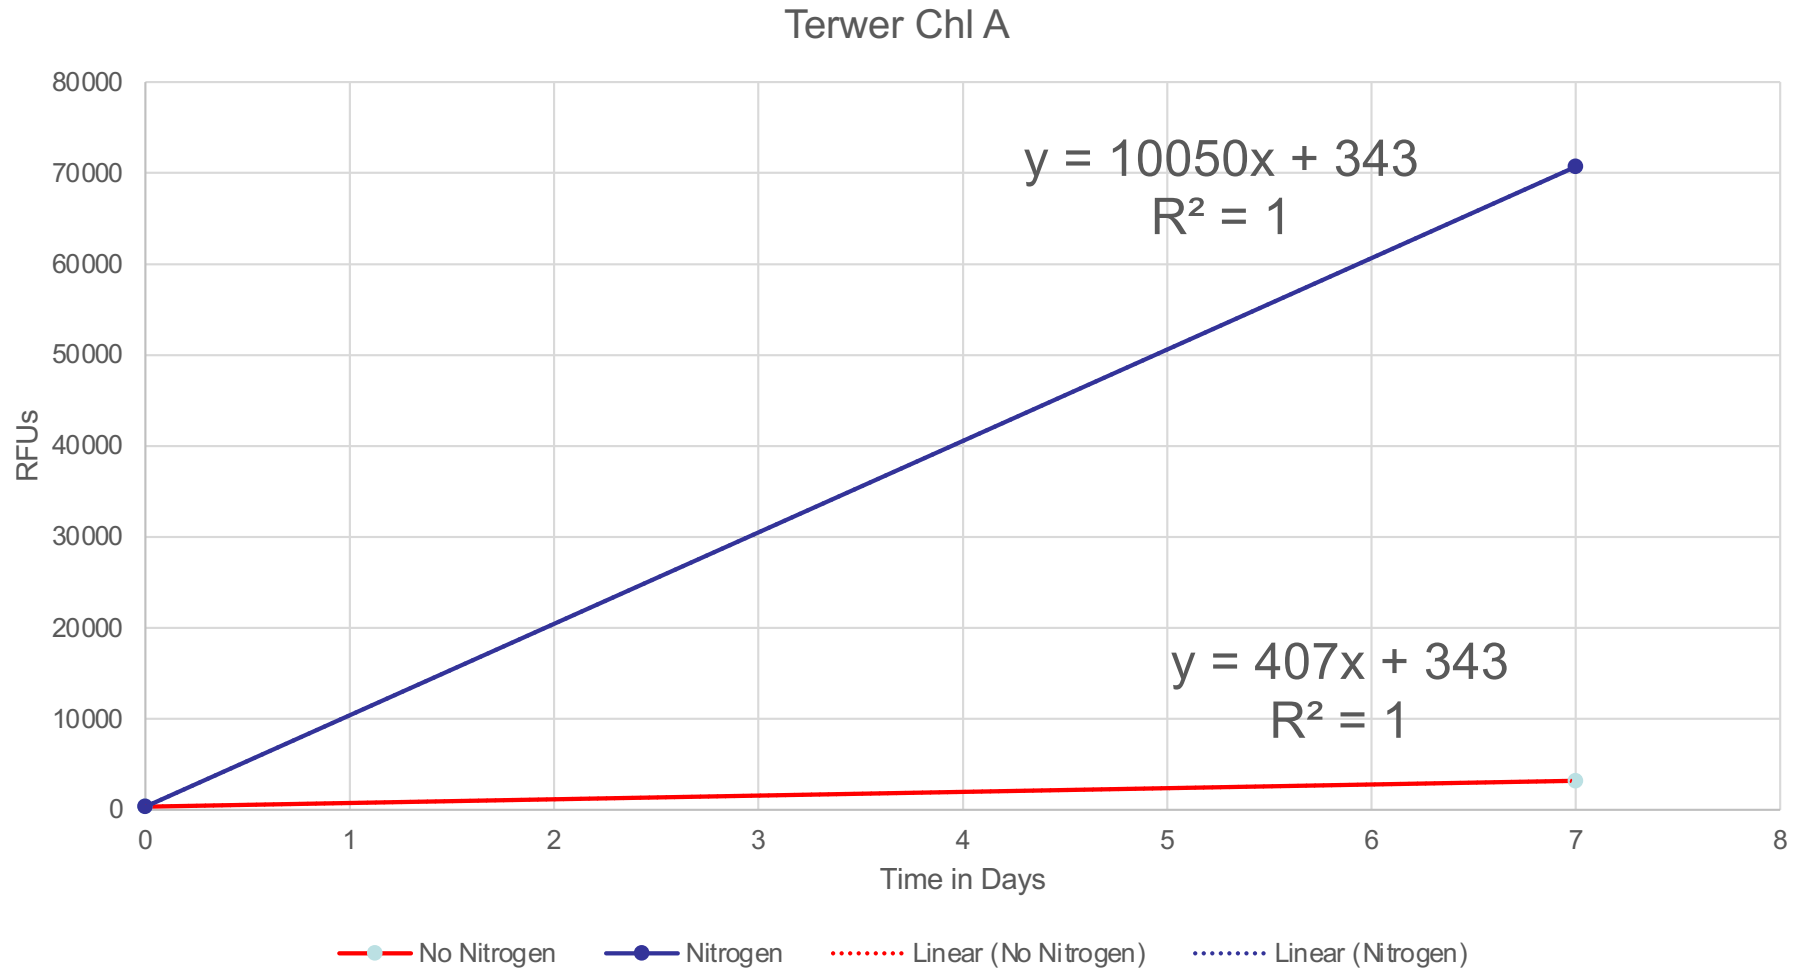

# Phycocyanin

Terwer Phycocyanin

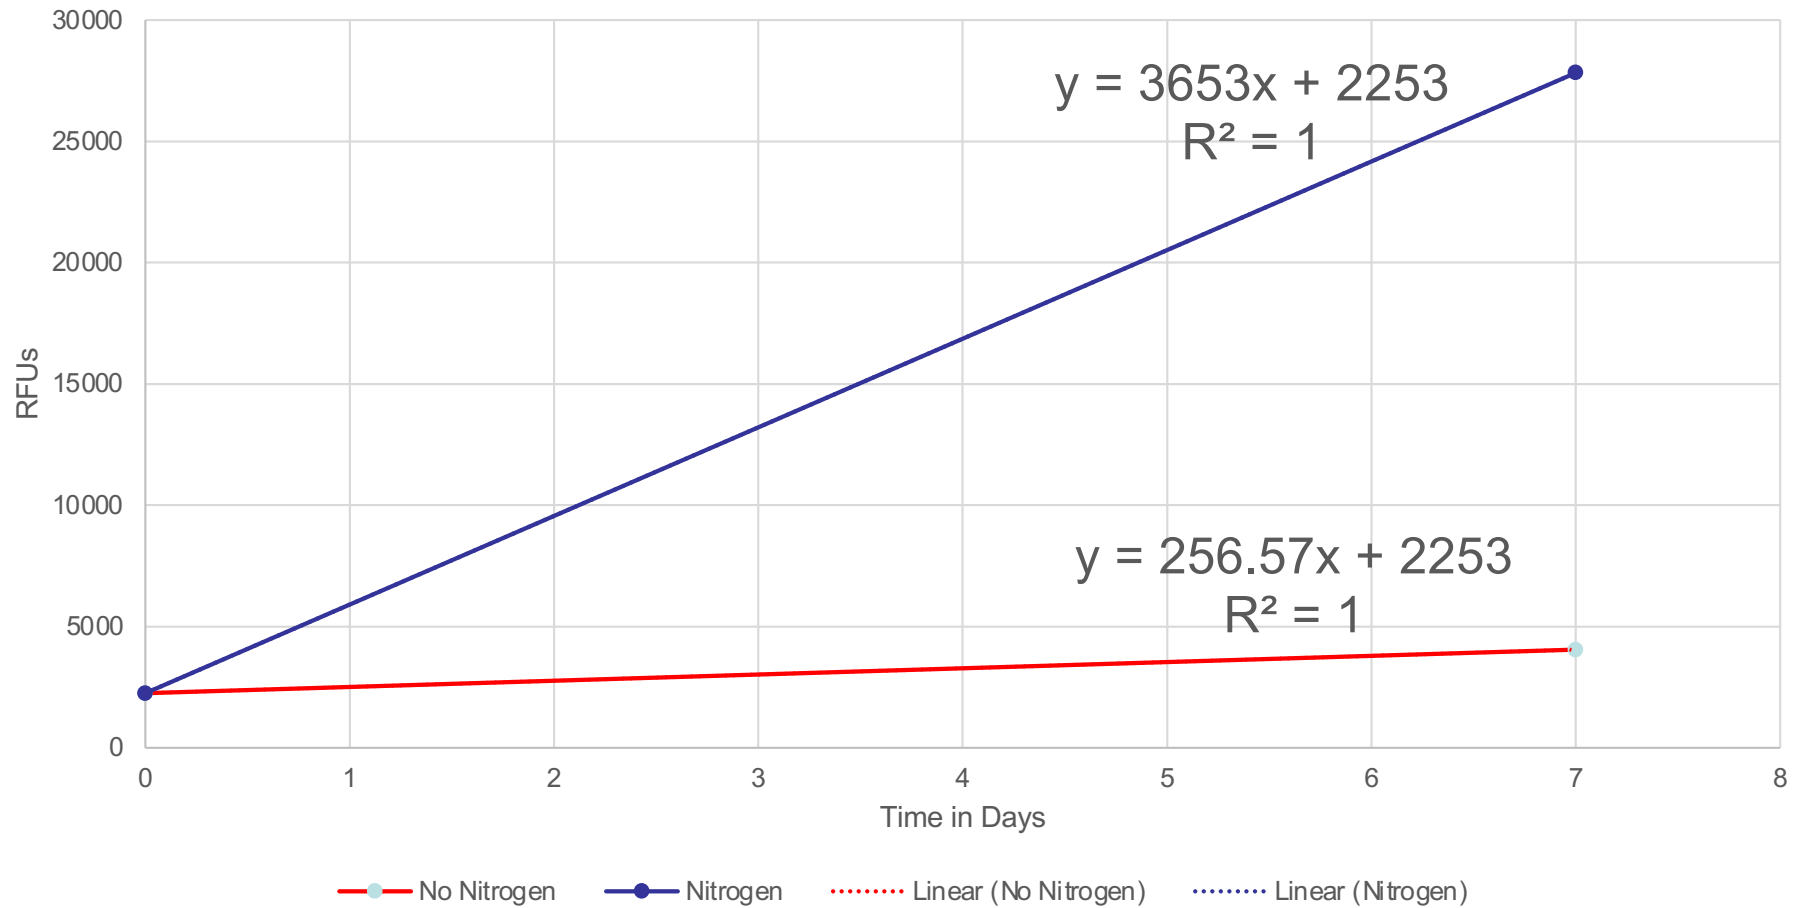

# Conclusions

- Are the RFUs for the controls the same as the treated samples?
- The rate of change of RFUs over time was greatest for water samples treated with nitrogen.
- The rate of change of Chl A was larger than the rate of change of phycocyanin measured in RFUs.

# First look was very limited!

## SUMMARY DATA

### ORLEANS

|        |      | Chlorophyll a  |            |
|--------|------|----------------|------------|
|        |      | Nitrogen added | No N added |
| Date   | Time | Mean           | Mean       |
| 18-Aug | 0    | 4709           | 4709       |
| 20-Aug | 2    | 15192          | 10542      |
| 22-Aug | 4    | 22948          | 6567       |
| 25-Aug | 7    | 685835         | 2428       |

### TERWER

|        |   | Chlorophyll a  |            |
|--------|---|----------------|------------|
|        |   | Nitrogen added | No N added |
| Date   |   | Mean           | Mean       |
| 18-Aug | 0 | 5612           | 5612       |
| 20-Aug | 2 | 20665          | 20243      |
| 22-Aug | 4 | 36855          | 10874      |
| 25-Aug | 7 | 667697         | 17485      |

### SITES POOLED

|        |      | Chlorophyll a  |            |
|--------|------|----------------|------------|
|        |      | Nitrogen added | No N added |
| Date   |      | Mean           | Mean       |
| 18-Aug | 0.00 | 5161           | 5161       |
| 20-Aug | 2.00 | 17929          | 15392      |
| 22-Aug | 4.00 | 29901          | 8721       |
| 25-Aug | 7.00 | 676766         | 9957       |

### ORLEANS

|        |   | Phycocyanin    |            |
|--------|---|----------------|------------|
|        |   | Nitrogen added | No N added |
| Date   |   | Mean           | Mean       |
| 18-Aug | 0 | 4420           | 4420       |
| 20-Aug | 2 | 14694          | 11261      |
| 22-Aug | 4 | 43234          | 4623       |
| 25-Aug | 7 | 186122         | 1706       |

### TERWER

|        |   | Phycocyanin    |            |
|--------|---|----------------|------------|
|        |   | Nitrogen added | No N added |
| Date   |   | Mean           | Mean       |
| 18-Aug | 0 | 4202           | 4202       |
| 20-Aug | 2 | 8737           | 8944       |
| 22-Aug | 4 | 9300           | 4655       |
| 25-Aug | 7 | 152194         | 6799       |

### SITES POOLED

|        |      | Phycocyanin    |            |
|--------|------|----------------|------------|
|        |      | Nitrogen added | No N added |
| Date   |      | Mean           | Mean       |
| 18-Aug | 0.00 | 4311           | 4311       |
| 20-Aug | 2.00 | 11716          | 10102      |
| 22-Aug | 4.00 | 26267          | 4639       |
| 25-Aug | 7.00 | 169158         | 4253       |

# Is the Data really Linear?

- When we consider data from 4 points in time, things change.

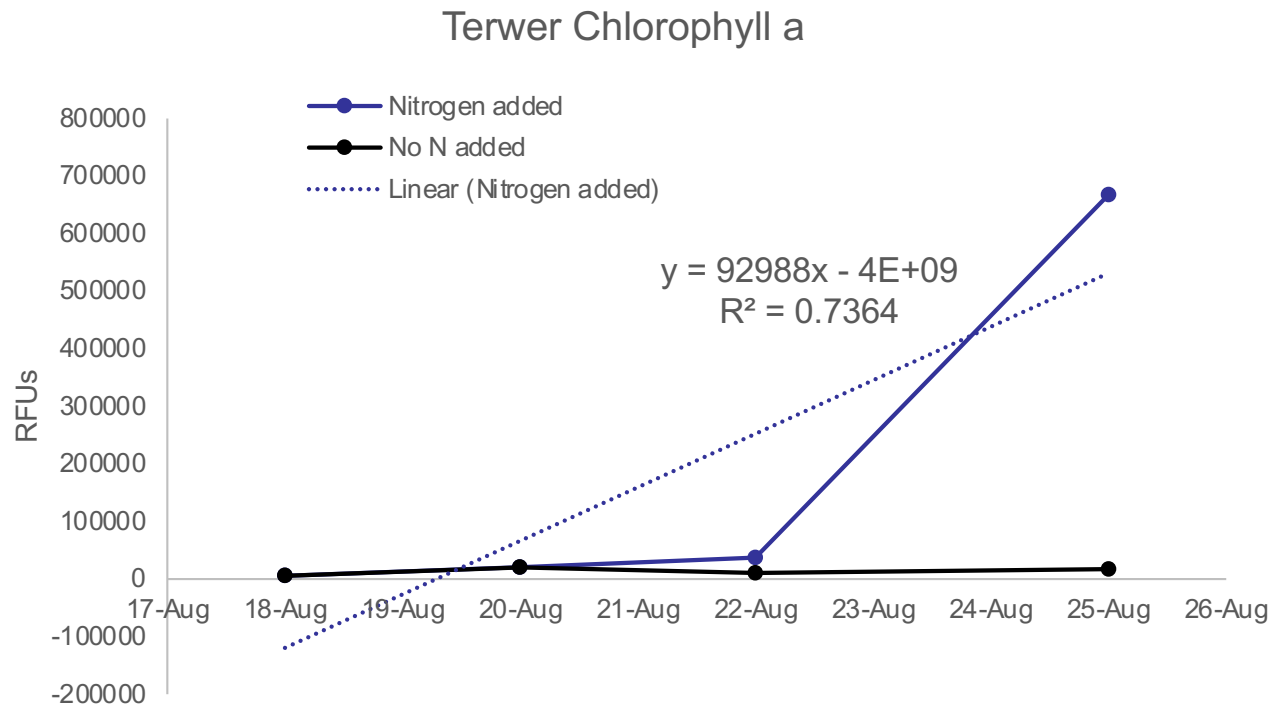

# Exponential Equation fits Better

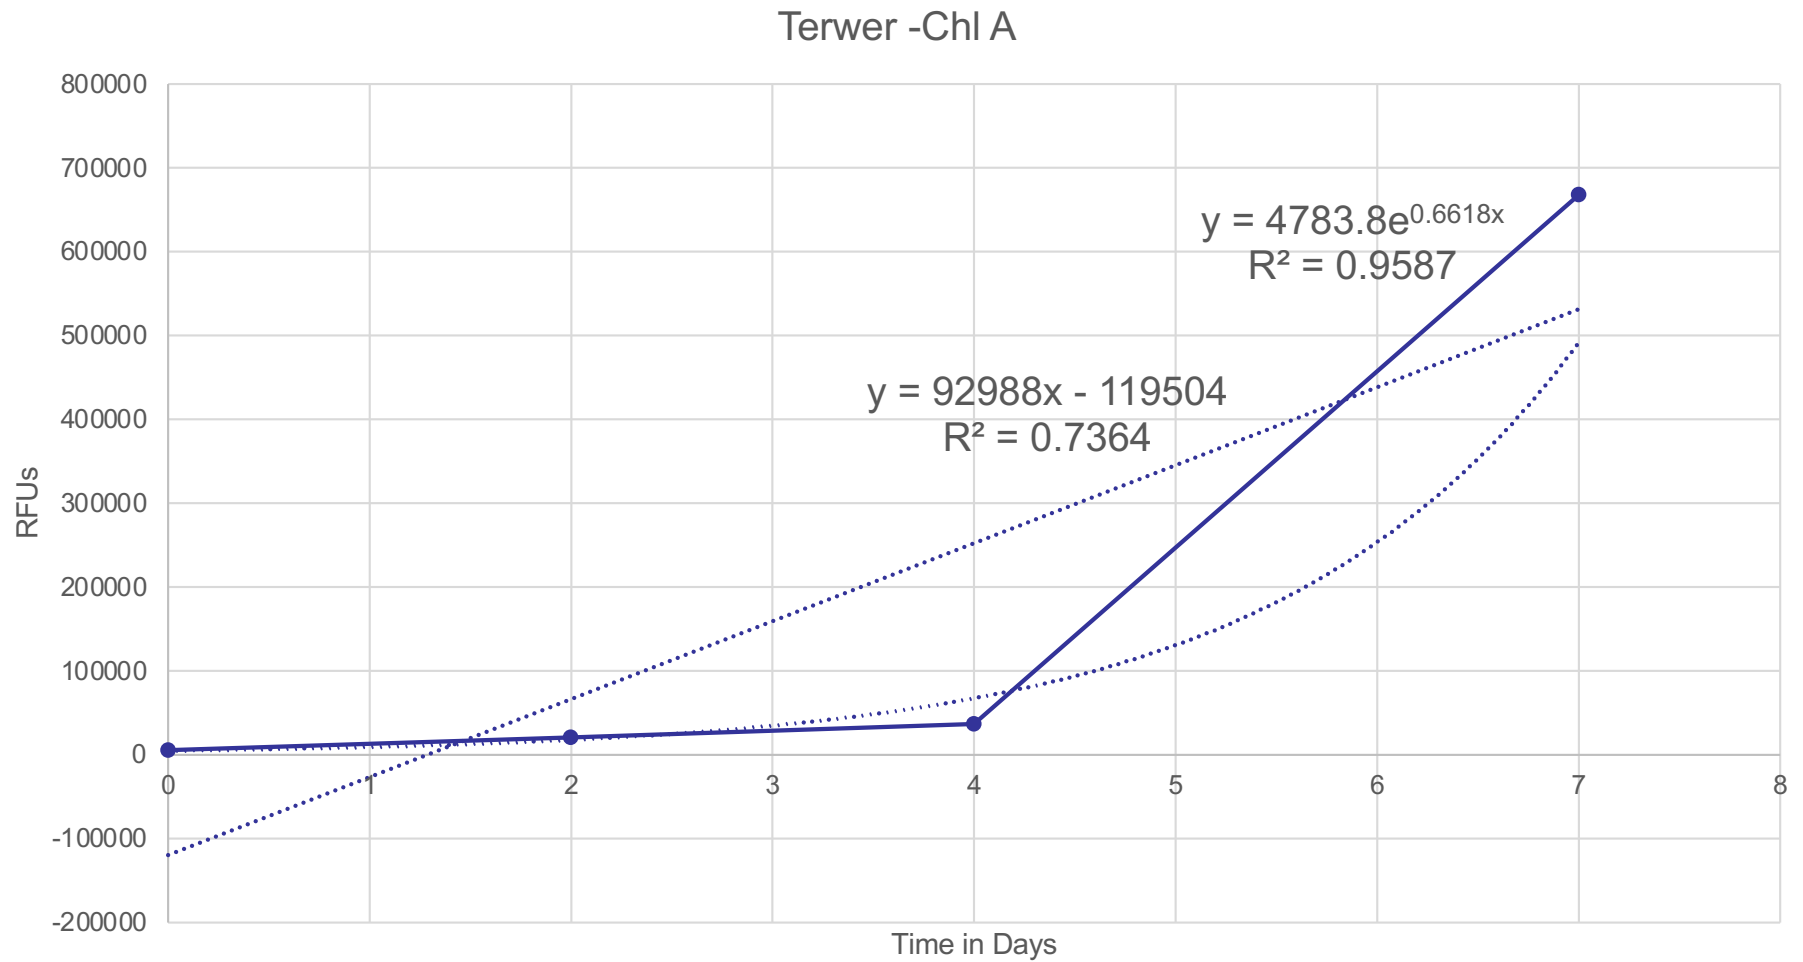

# Terwer-Phycocyanin

Terwer Phycocyanin

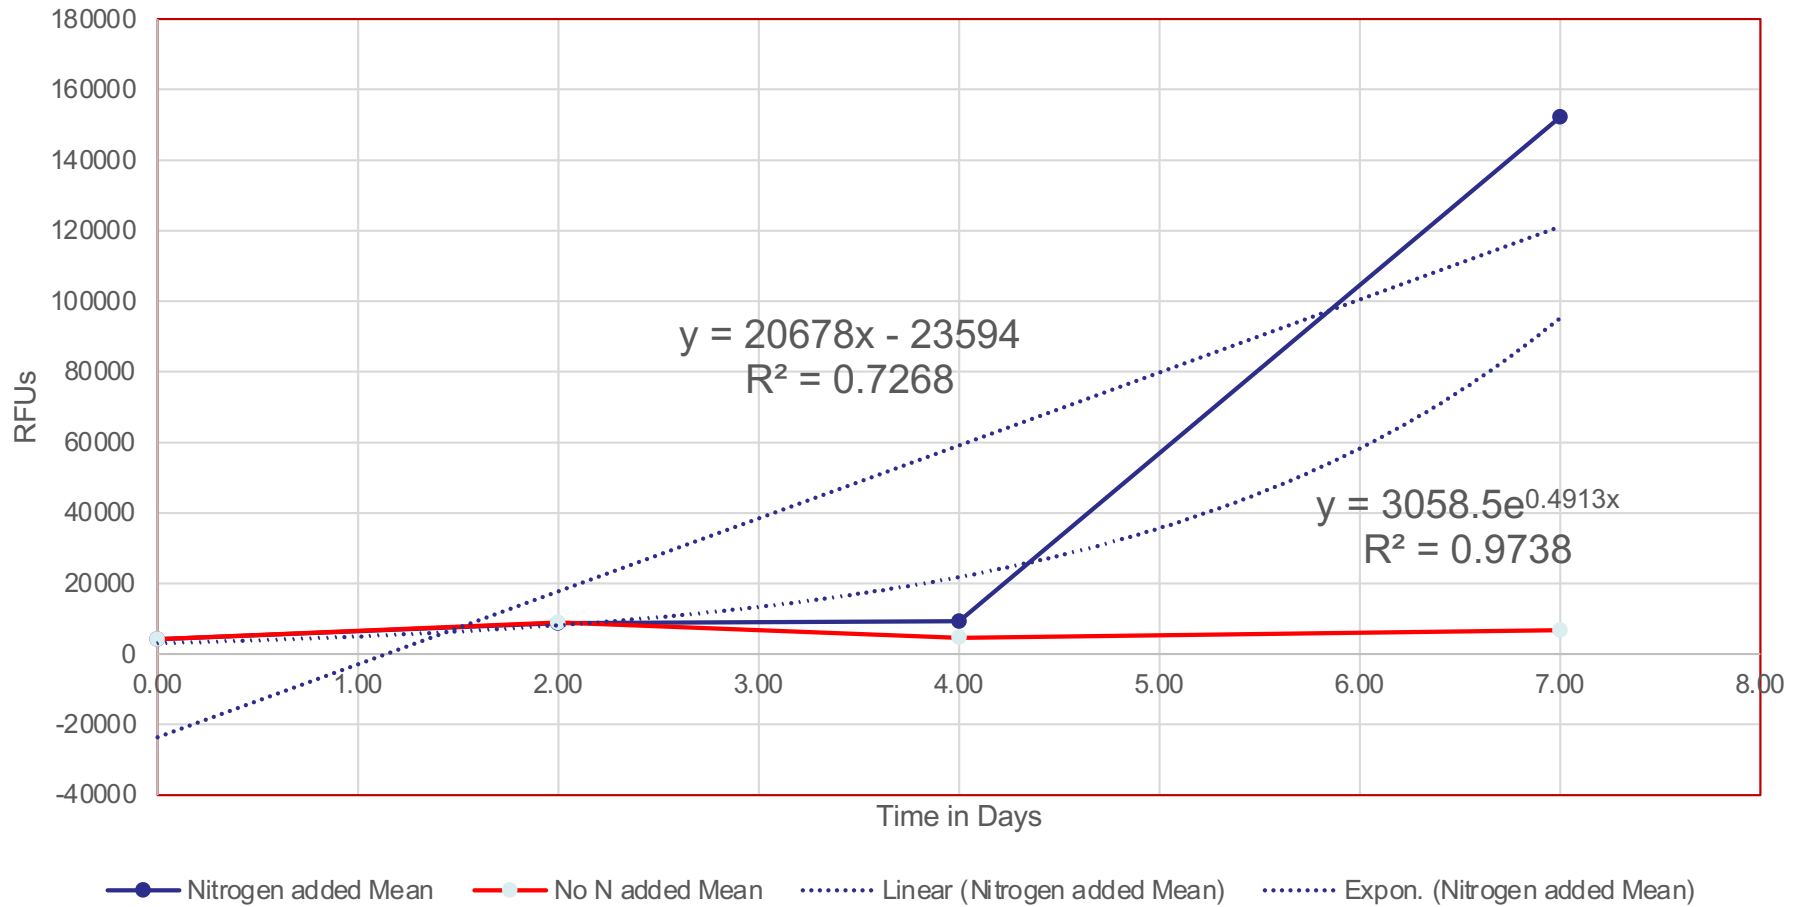

# Orleans-Phycocyanin

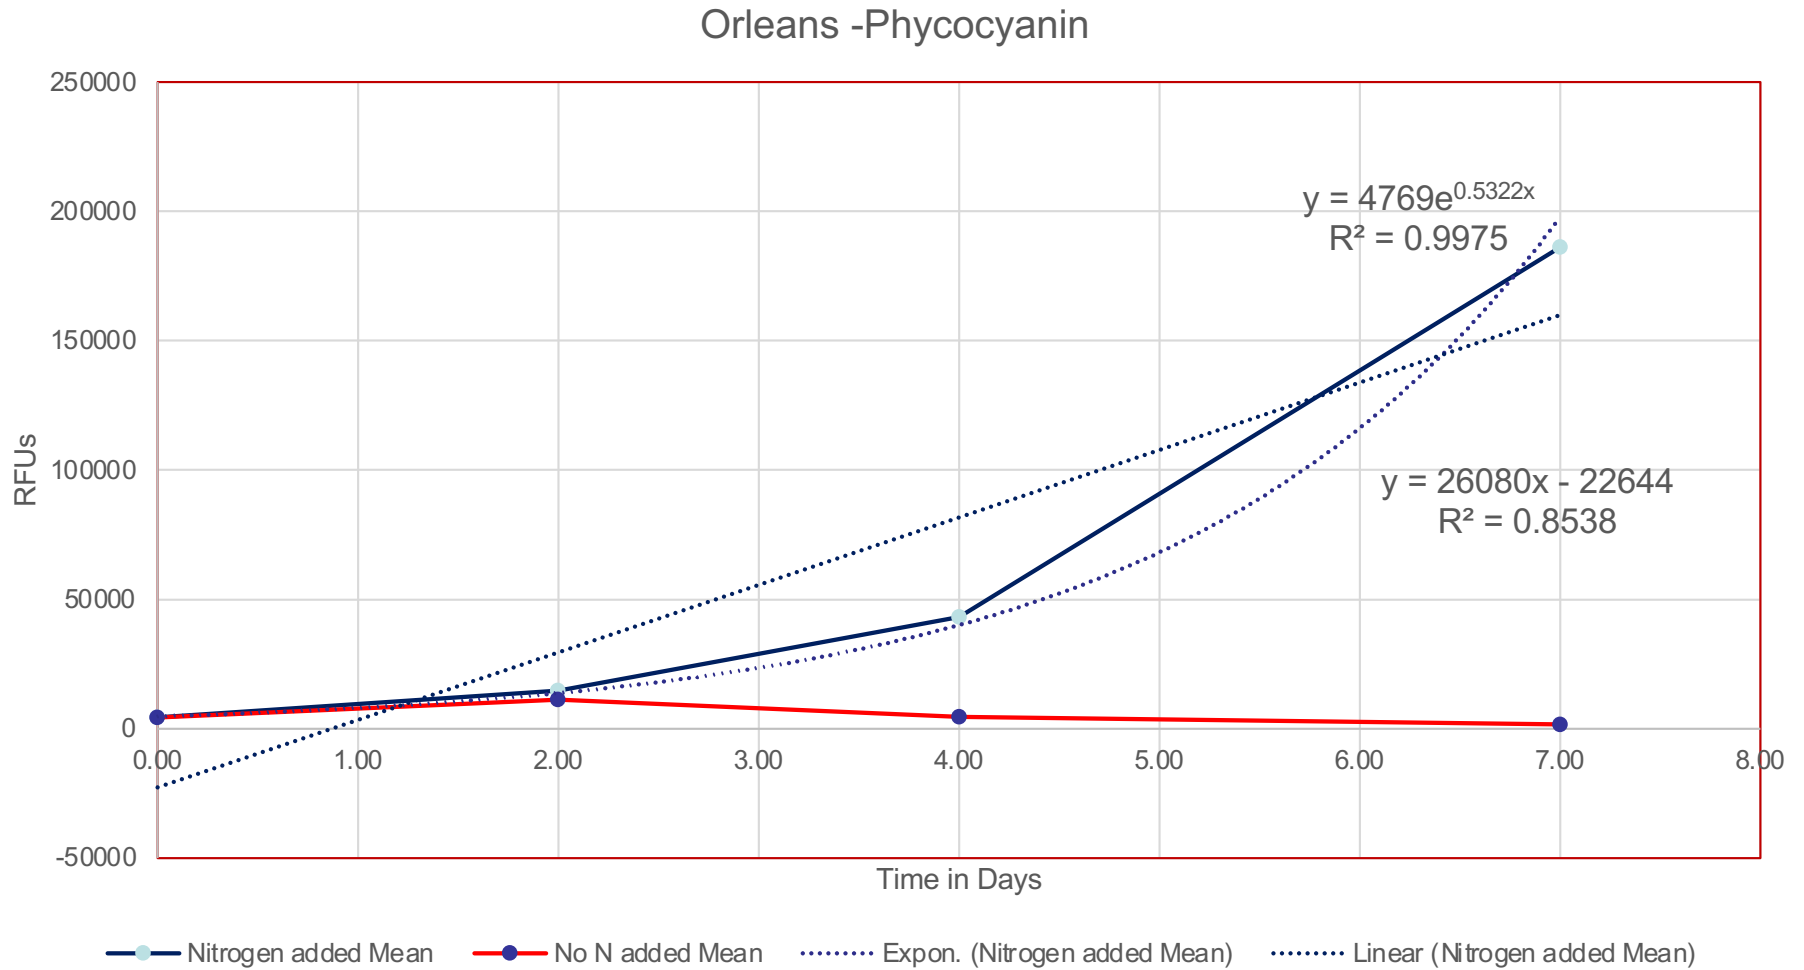

**Is there an alternative  
explanation for the data?**

# The 'Problem' with the RFU Pigment Method

RFUs Could Change Even Though Cell # or Biomass has not Changed

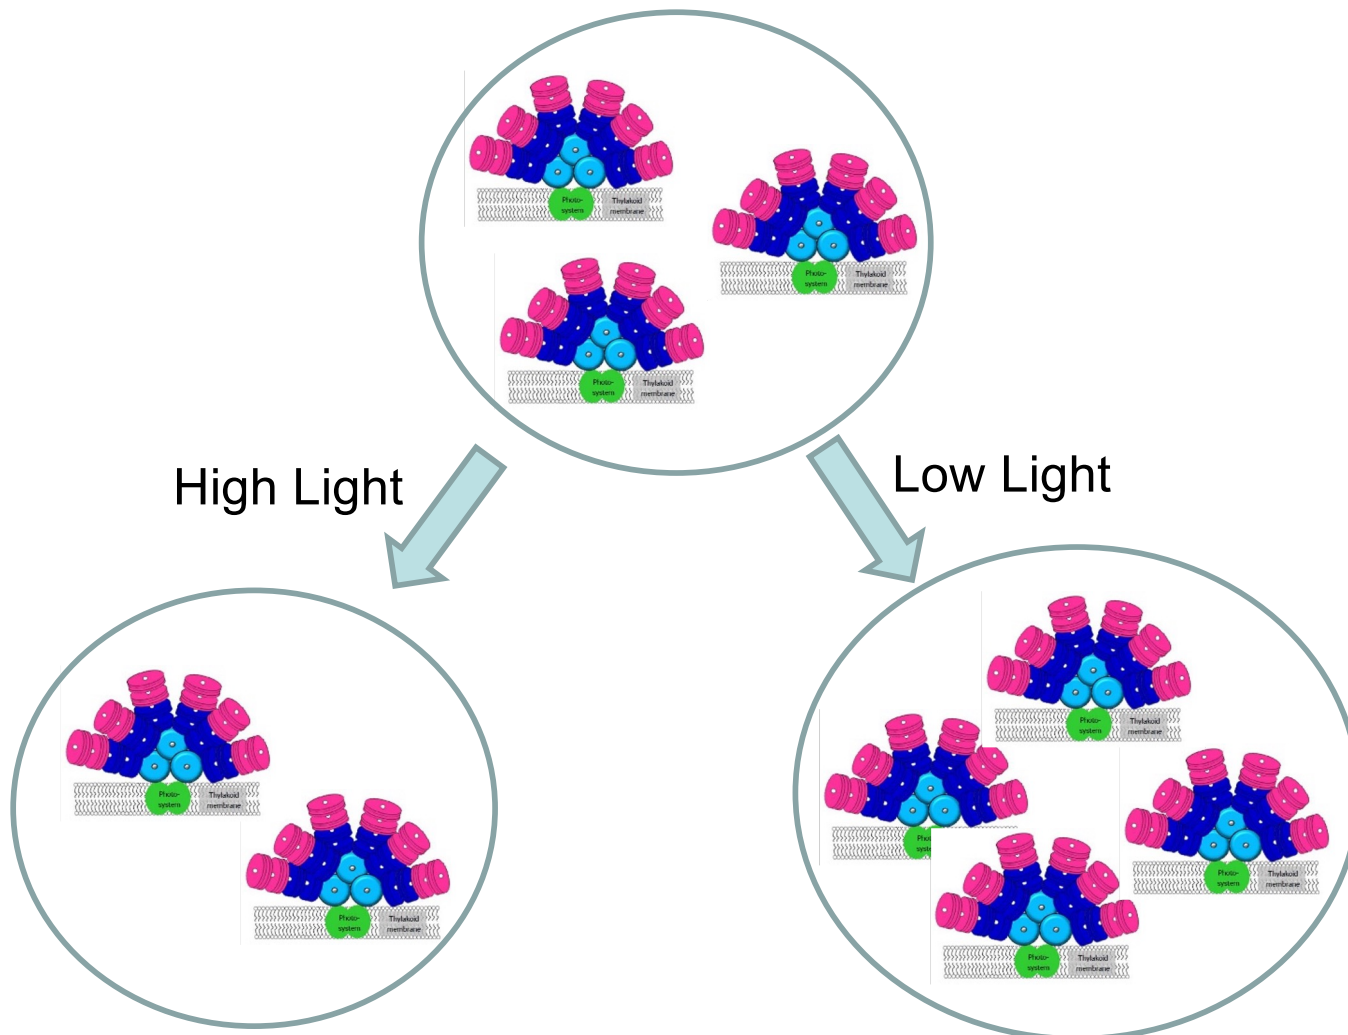

If increased ChlA or Phycocyanin is Due to light, RFUs would fluctuate on 12 hour cycles

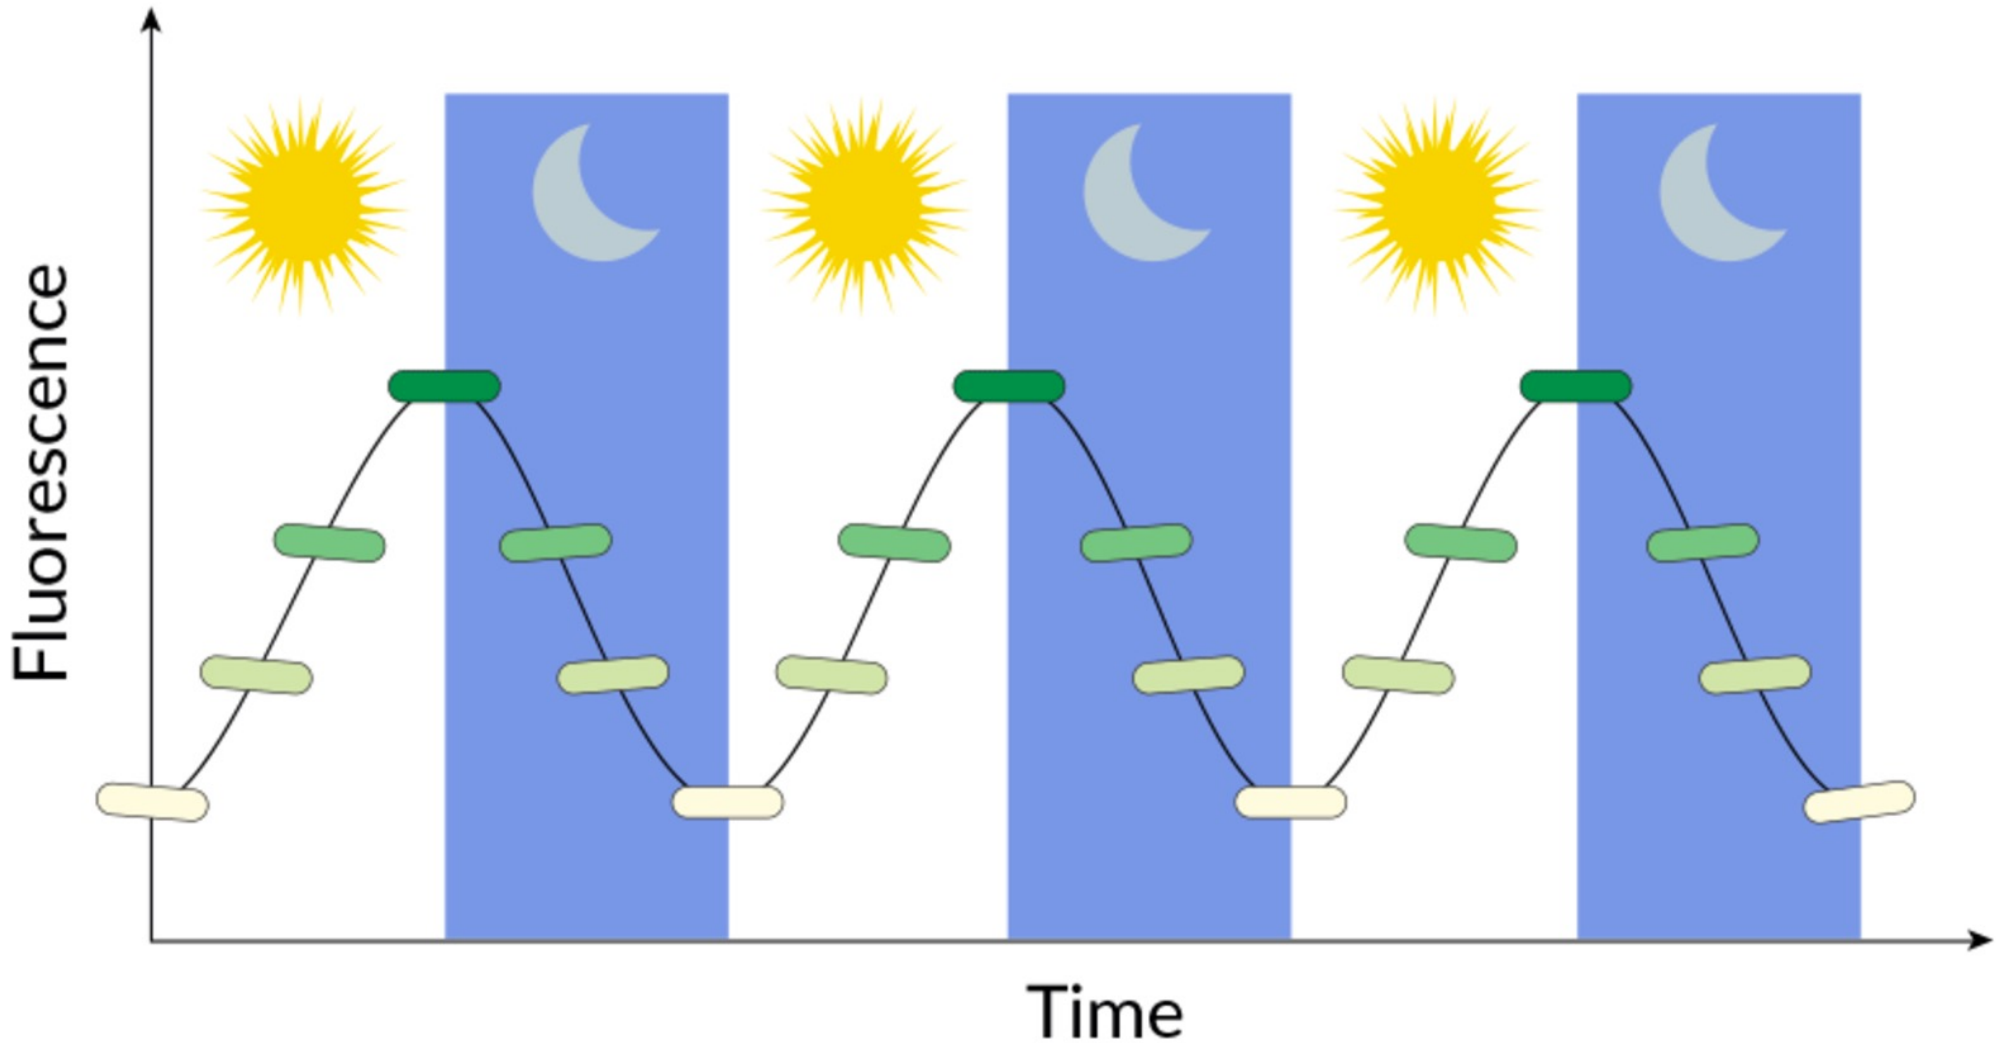

# Conclusion

- “Overall, in both the Orleans and Terwer samples, the water treated with nitrogen experienced much greater exponential growth of both phycocyanin and chlorophyll a than the untreated water.” ~Math 113 student
- “I believe that the growth of Chl a and Phycocyanin is more exponential than linear. I do not think that the algae will be able to grow exponentially forever.” ~Math 113 student

# More Conclusions

- “Based on my graphs I can conclude that nitrogen is a limiting factor in the growth of Chlorophyll a and Phycocyanin in both Orleans and in Terwer.”  
~Math 113 student
- “In the long run, I feel the growth of Chl a and Phycocyanin will perform in a logistic growth pattern more than an exponential or linear pattern.”  
~Math 113 student

# Can we reject $H_0$ ?

**We can reject  $H_0$ ,  
the data support  $H_1$ :**

*N is limiting algae growth in Klamath River  
water samples.*

# Why is Nitrogen the *Limiting Factor* ?



[http://blog.healthkismet.com/wp-content/uploads/2012/04/klamath\\_lake\\_blue\\_algae.jpg](http://blog.healthkismet.com/wp-content/uploads/2012/04/klamath_lake_blue_algae.jpg)

Klamath Lake 2012

# Phases of Mitosis

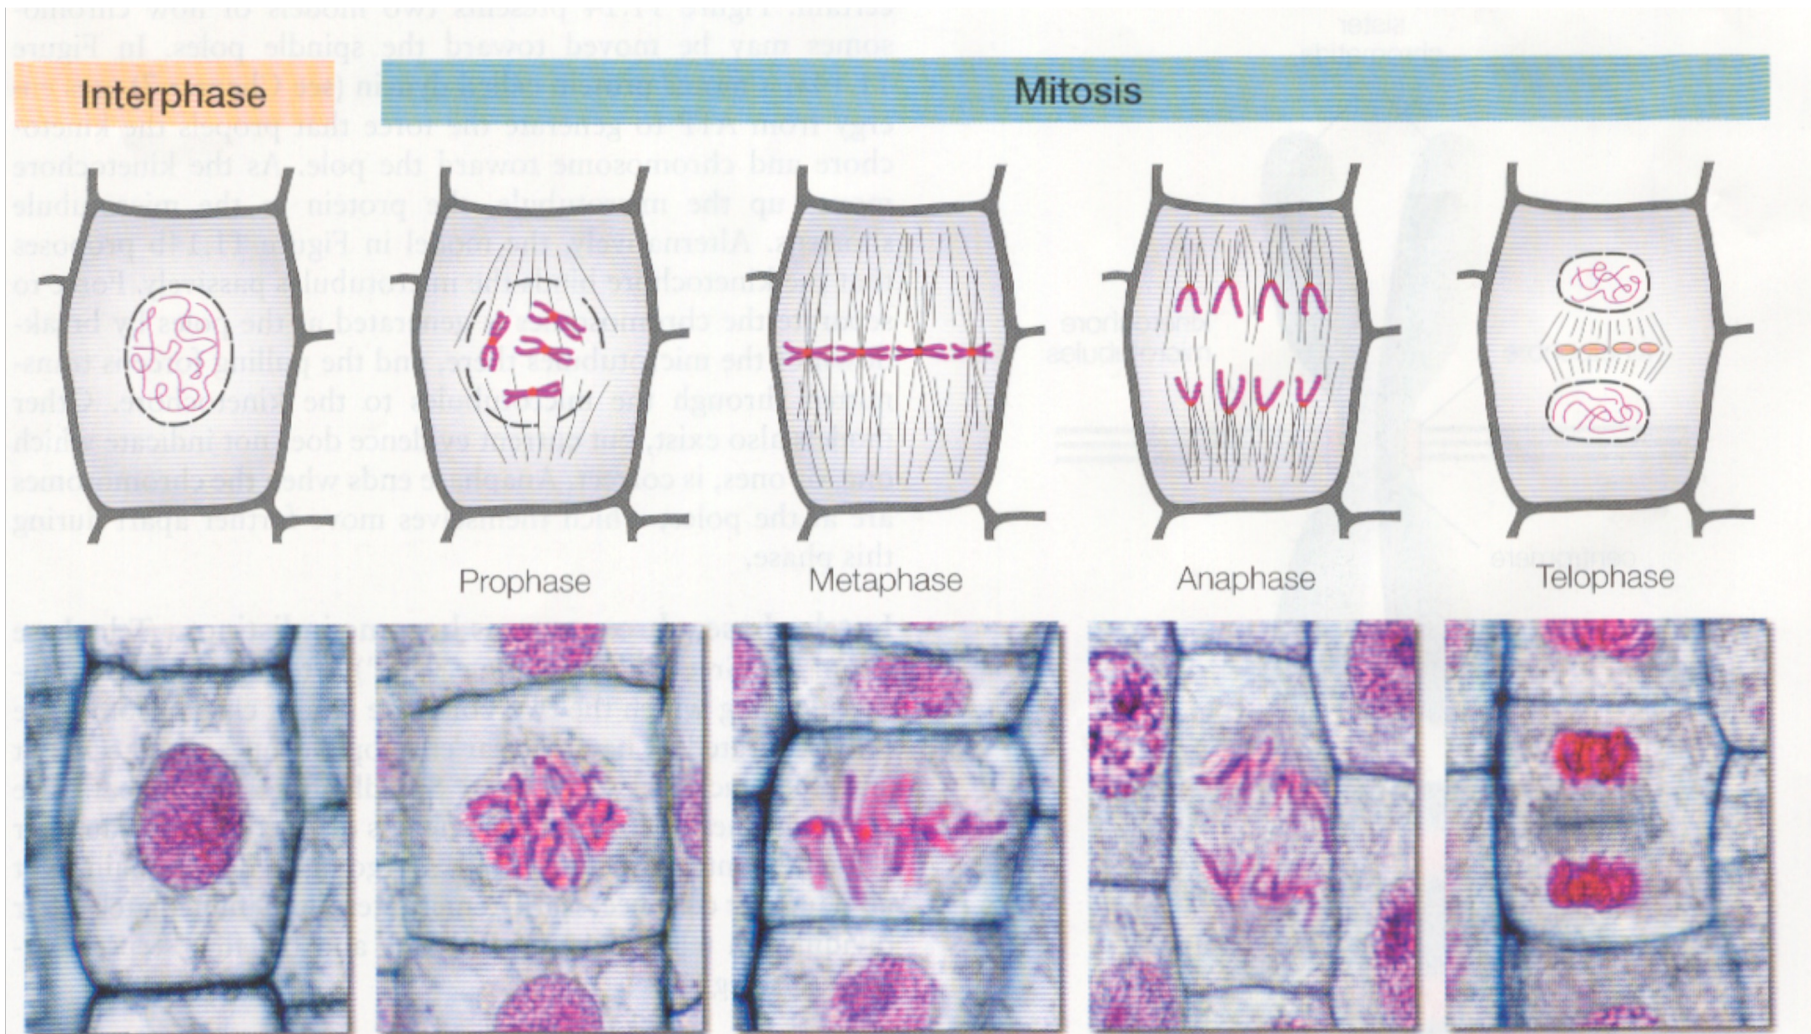

**Figure 11.10** The phases of mitosis In interphase, the chromosomes are not visible with the light microscope and the nuclear envelope is intact. The nucleolus (or nucleoli) is apparent (though not in the photograph shown here). In prophase, the DNA condenses and chromosomes become apparent. The mitotic spindle begins to form and the nuclear envelope breaks down. Chromosomes align themselves in the center of the cell at metaphase. Sister chromatids separate in anaphase and move to the poles. In telophase, the sister chromatids have completed their poleward migration and the chromosomes become diffuse. The nuclear envelope re-forms and the nucleolus reappears. Cytokinesis begins during telophase with a phragmoplast and cell plate being visible. The photographs shown here are of mitosis in an onion root tip. Because of its simple structure, the growing root is an excellent place to observe cell division in plants.

Graham et al. 2003

# Cell Division Cannot Happen Without DNA Replication

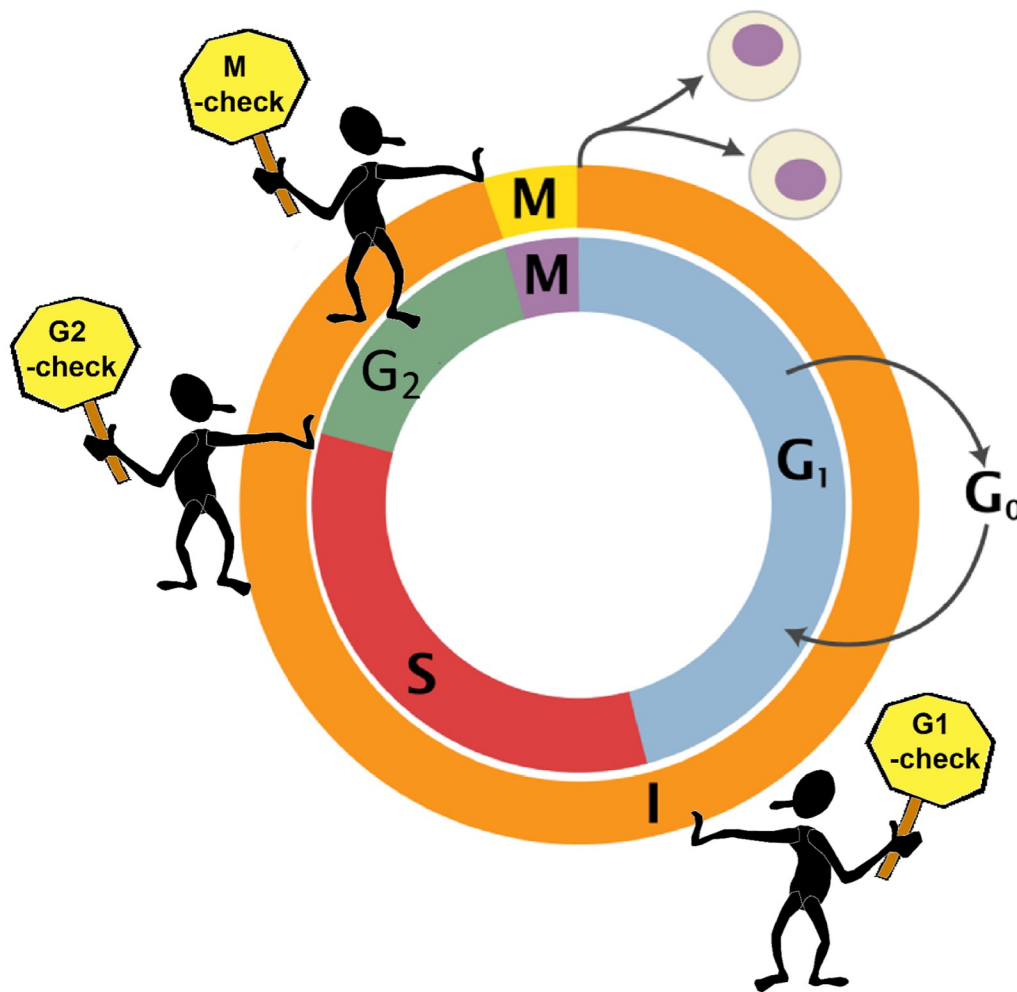

- DNA ok?
- Enough resources to replicate DNA and build extra Proteins?
- Is environment ok?

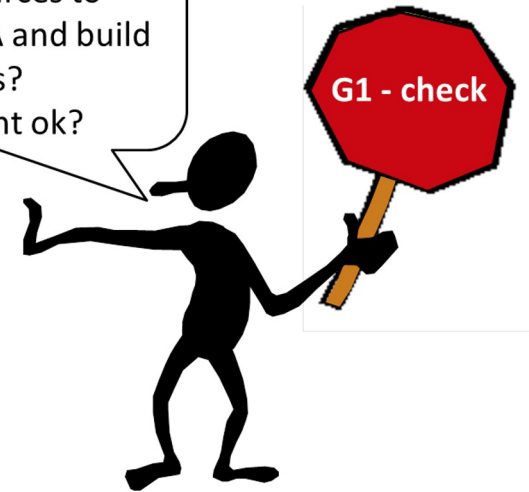

# Nitrogen is required for DNA Synthesis

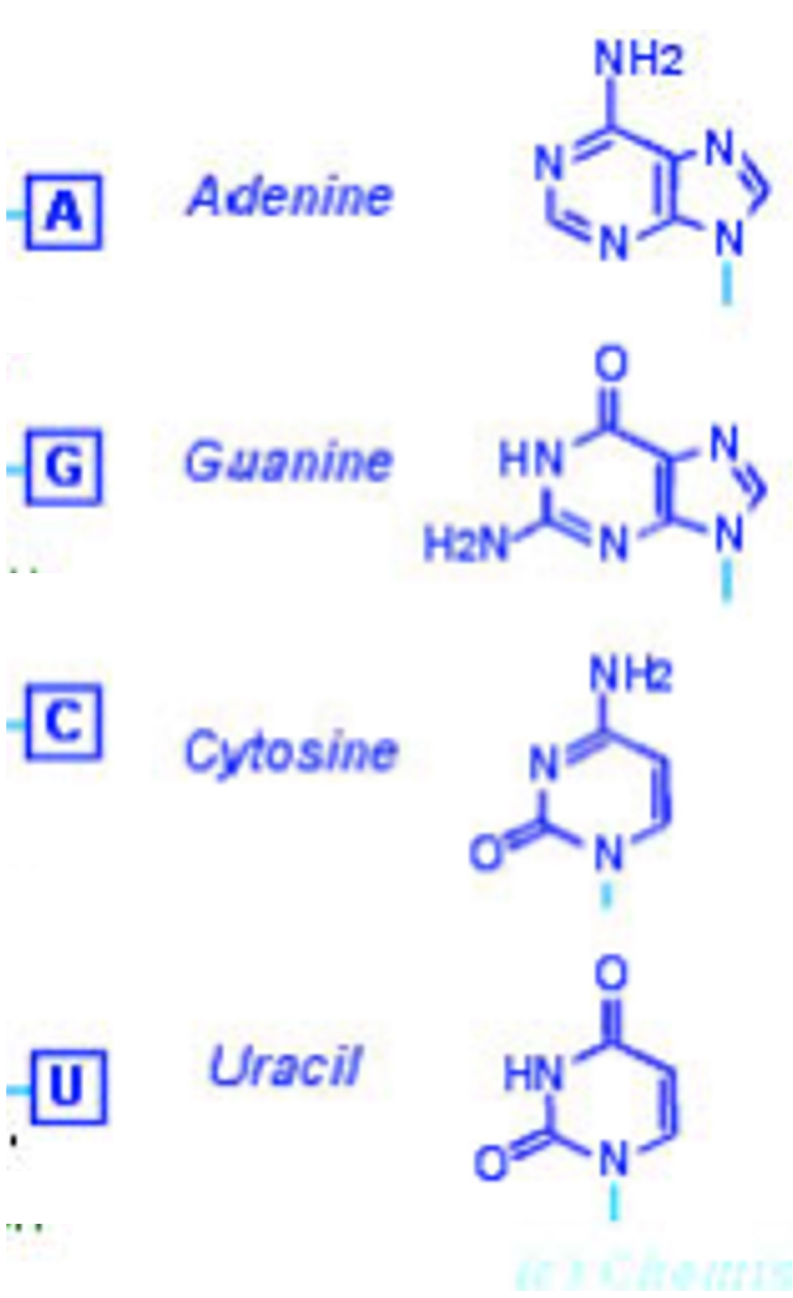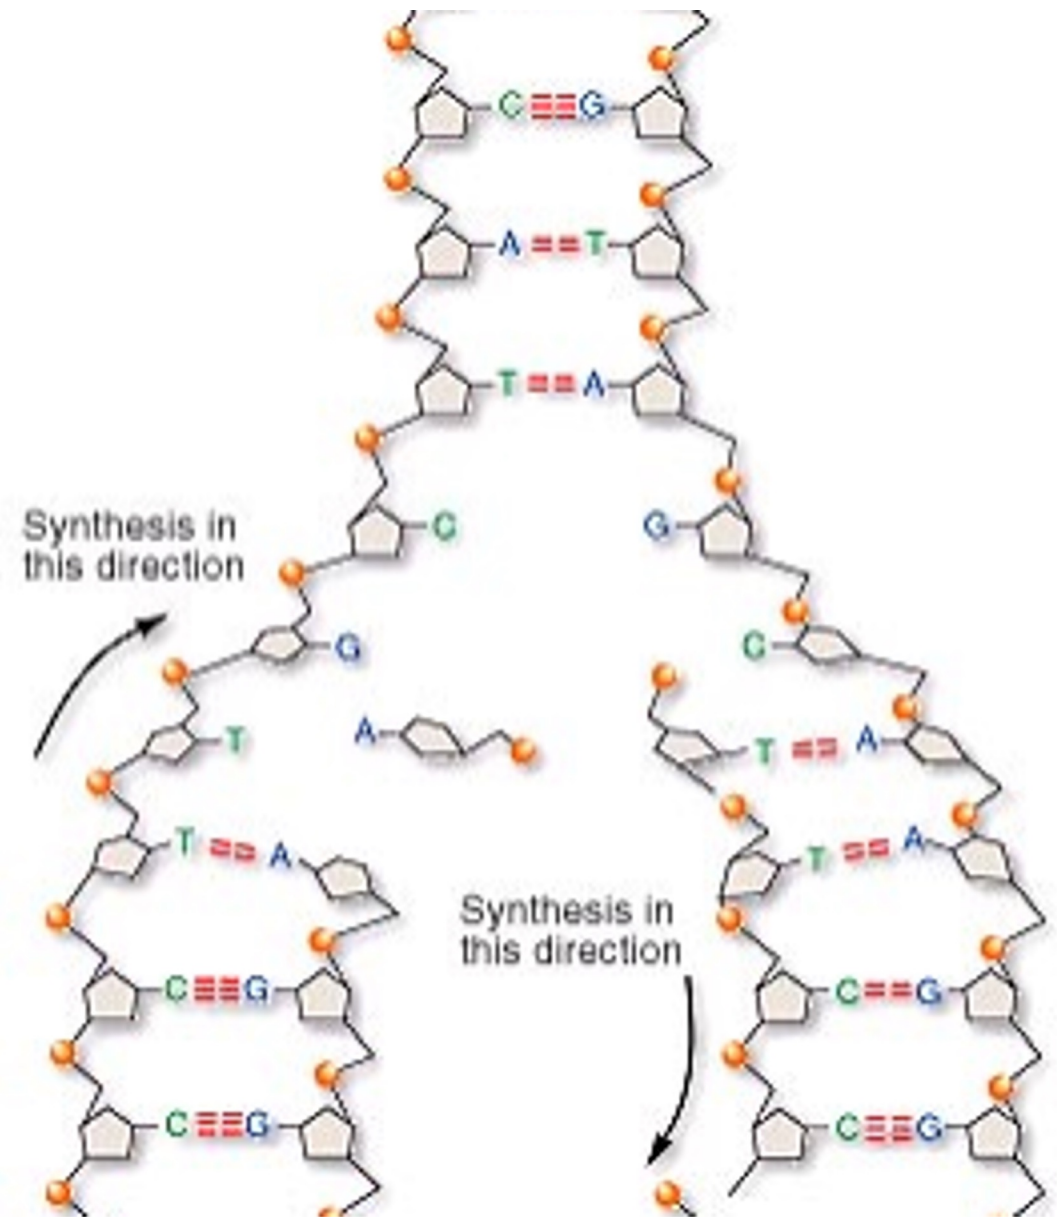

# Phosphorous is Required, too!

As You'll Study In Chemistry  
Next Semester!

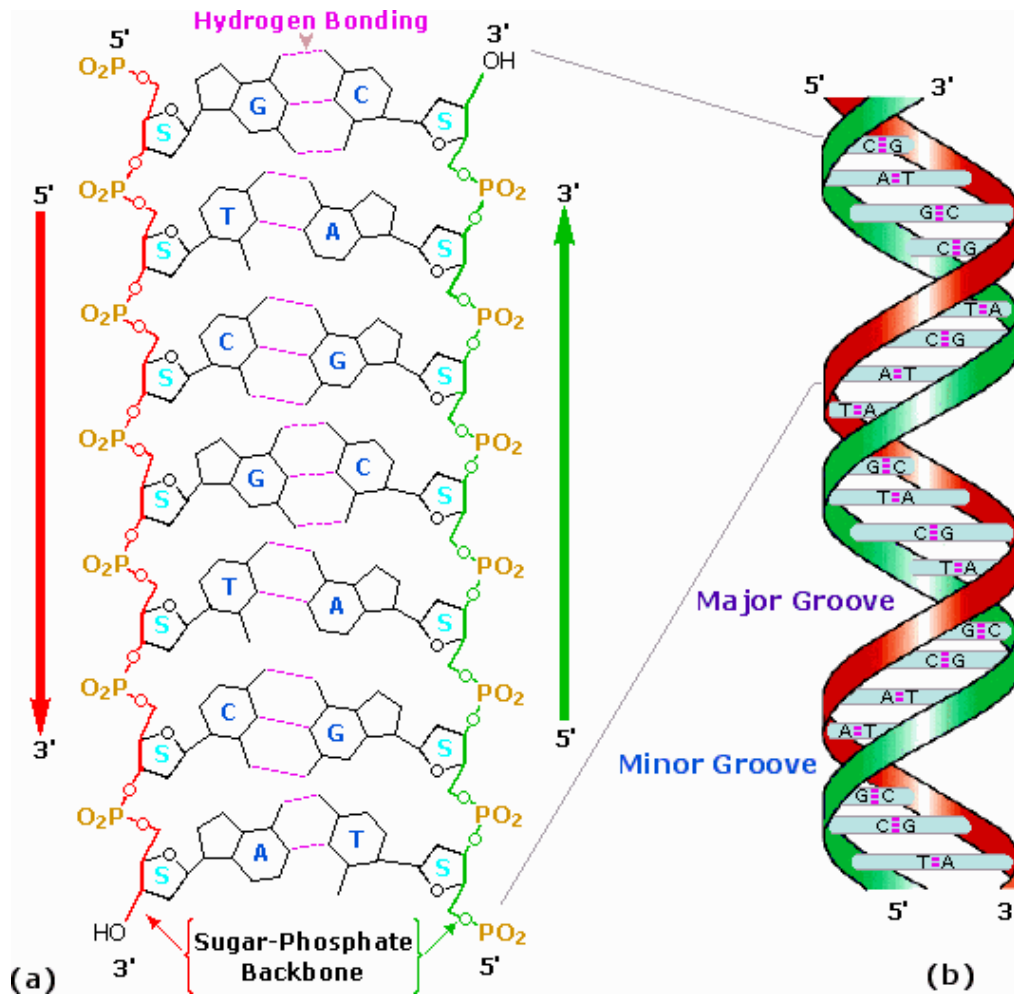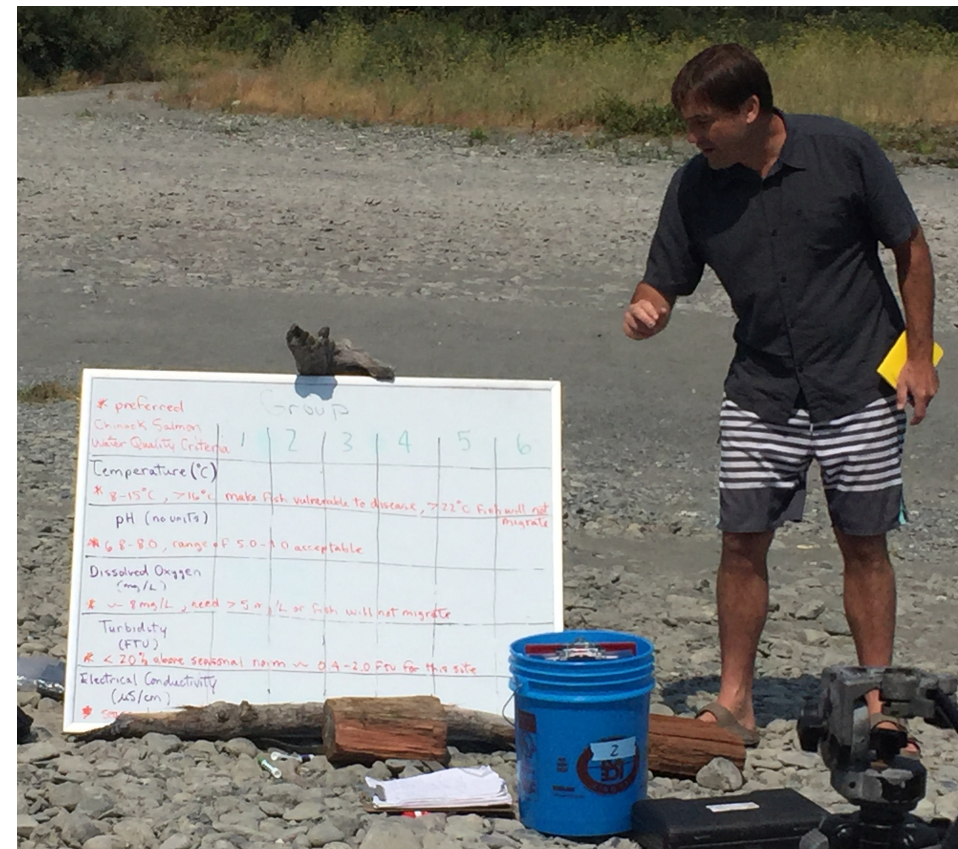

# Why do we care?

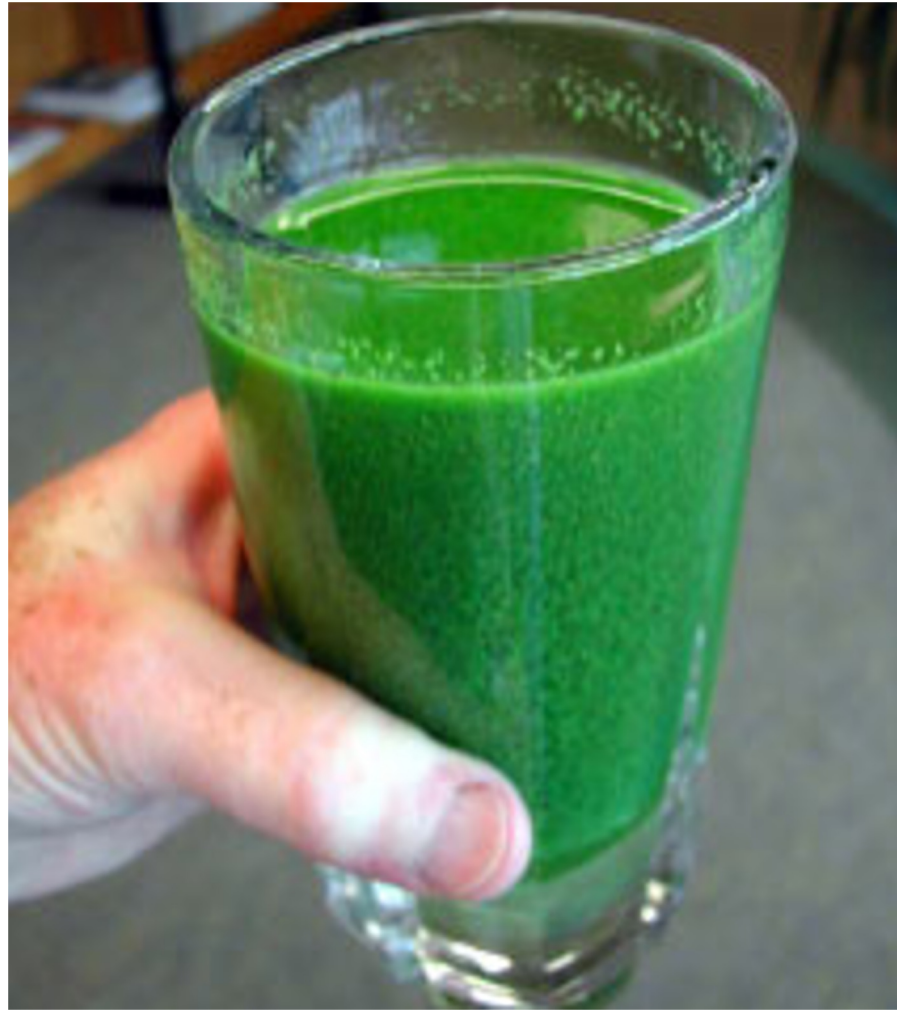

# The Microcystin Peptide is Toxic

- Rashes
- Blistering
- Nausea
- Vomiting
- Fever
- Liver Failure

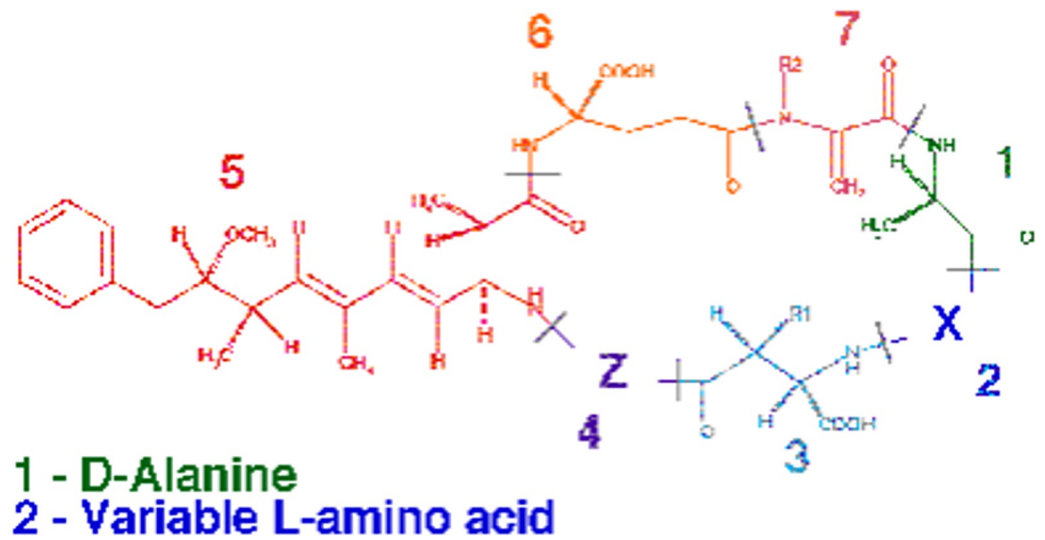

X= Leucine

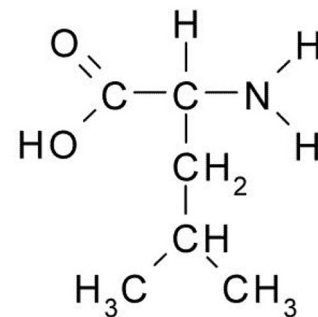

R= Arginine

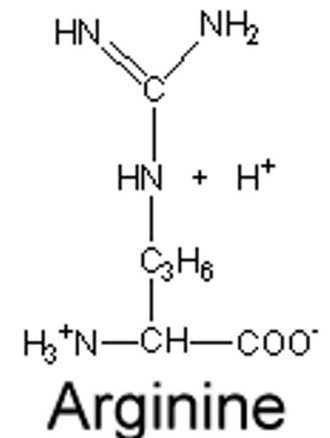

# The World Health Organization has set the following thresholds for both cell and toxin concentrations in recreational waters

|                | <u>cells/ml</u>   | <u>toxin <math>\mu\text{g/L}</math></u> |
|----------------|-------------------|-----------------------------------------|
| Low Risk:      | 20,000            | 4                                       |
| Moderate Risk: | 100,000           | 20                                      |
| CA Posting     | 40,000            | 8                                       |
| Copco 7/13/05  | $11 \times 10^6$  | 667*                                    |
| 2005 Maximum   | $163 \times 10^6$ | 1994                                    |

>92x the Tolerable Daily Intake!  
TDI=  $0.04 \mu\text{g/kg bw}^{-1}$

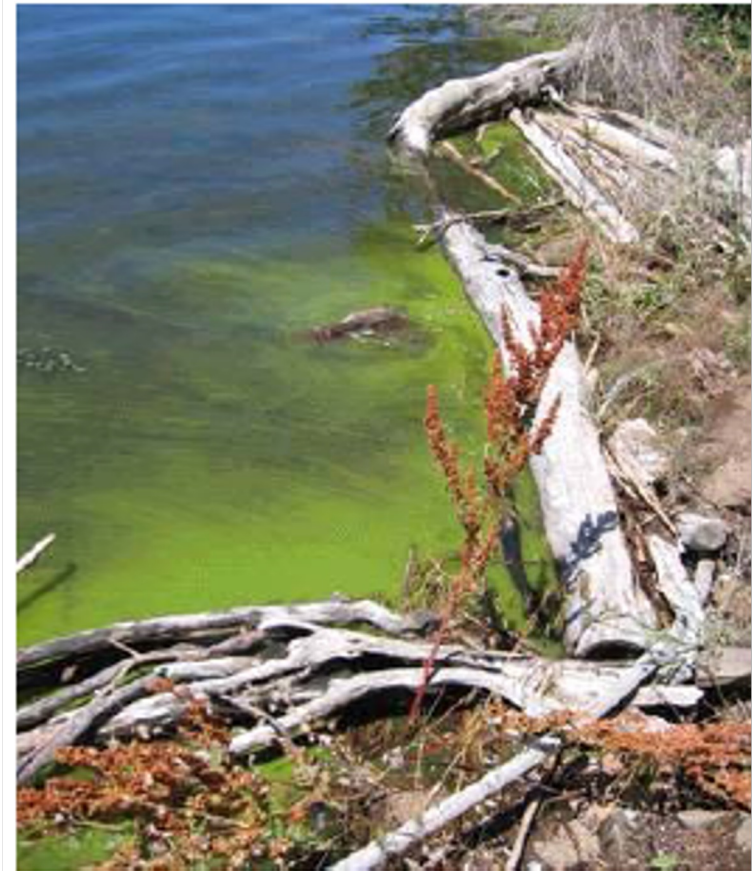

Copco shoreline  
standing on  
shoreline 7-13-05

# Klamath Reflection #3

## Due Thursday at 11:59pm

Now that you have completed the eutrophication experiment, think about your own intellectual growth over the semester. What did you think of the process back in the Summer Immersion? Do you think about it differently now, and how? What do you think about the role of math, botany, and chemistry in understanding complex environmental and social problems? Have those thoughts changed since you've arrive at HSU?
