# Supplementary material for: First year STEM curriculum co-created with Indigenous scientists improves intellectual growth, psychosocial factors associated with retention, and academic achievement of students from racially minoritized groups historically underrepresented in STEM.
Source: Research Square preprint supplement (doi:10.21203/rs.3.rs-3062893/v1), 2023-06-30
Supplement: Supplementary file 3 [file 1f26ca0665d5f85f761df419.pdf]

**Survey for Klamath Connections Sections of NAS 104 and NAS 200**

*Please take a few minutes to give feedback about your experience.*

1. What is your HSU ID? \_\_\_\_\_

2. Which Native American Studies course are you enrolled in?

NAS 104

NAS 200

3. In what region was the high school you graduated from?

Local

Northern California

San Francisco Bay Area

Sacramento

Coast

Central California

Los Angeles

San Diego

A state other than California

A country other than the United States

4. What is your ethnic background? (check all that apply)

African American

American Indian

Asian American

Hispanic/Latino

Pacific Islander

Unknown

White

5. What is your major?

Biology

Botany

Environmental Science

Environmental Resources Engineering

Fisheries Biology

Wildlife

Zoology

Other \_\_\_\_\_

6. What is/are your career goal(s)? (if you know at this time)

7. Please rate your understanding of Native American cultures BEFORE entering the Klamath Connections program.

| I didn't know anything | I knew a little, but not much | I knew a fair amount | I knew a great deal | I would consider myself an expert |
|------------------------|-------------------------------|----------------------|---------------------|-----------------------------------|
| ○                      | ○                             | ○                    | ○                   | ○                                 |

PLEASE COMPLETE SECOND PAGE OF THE SURVEY →

**8. Has your understanding of Native American Cultures increased as a result of the Klamath Connections program?**

No → (skip to Qu. 9)

Yes → What aspect(s) of the Klamath Connections program affected your understanding of Native American cultures? (check all that apply from the box below)

- Summer Immersion study of the 2002 Klamath fish kill
- Summer Immersion viewing of "A River Between Us"
- Summer Immersion presentation by Yurok Tribal leaders
- Summer Immersion field biology experience with Yurok scientists
- Summer Immersion field biology experience with HSU faculty
- Summer Immersion water quality experiment and analysis
- FOR100 "Salmon is Everything" discussion
- FOR100 Eutrophication experiment discussion
- FOR100 visit by Karuk water quality scientist Susan Corum
- FOR100 presentation by Yurok wildlife biologist and TEK expert Seafha Ramos
- FOR100/Humboldt room activity on Klamath basin environmental issues
- FOR100 Dakota Access Pipeline Discussion
- BOT105 eutrophication laboratory
- Math eutrophication assignments
- CHEM109 Klamath basin phosphorous laboratory
- FYS activities
- FISH260 activities
- RAMP mentor
- Klamath baram symposium
- George Blake art exhibit
- NAS104
- NAS200
- Other \_\_\_\_\_

**9. Do you think having information about issues that affect Native American communities has better prepared you for work in your future career?**

No → Why not?

Yes → How so?

**10. Do you see parallels between issues that affect Native American communities and issues in your own community?**

No

Yes → Please share an example:

*Thank you for your feedback!*
